# Supplementary material
Source: PubMed Central journal article supplement (PMC6511979)
Supplement: NIHMS1021778-supplement-Suppl_Table_DEGs.pdf [file NIHMS1021778-supplement-Suppl_Table_DEGs.pdf]

| ensgene    | baseMean   | log2FoldChar | lfcSE      | stat       | pvalue   | padj     |
|------------|------------|--------------|------------|------------|----------|----------|
| ENSMUSG000 | 452.166012 | 1.50261102   | 0.15855076 | 9.39099124 | 5.94E-21 | 6.86E-17 |
| ENSMUSG000 | 400.047109 | 1.68727269   | 0.19238237 | 8.78217436 | 1.60E-18 | 9.26E-15 |
| ENSMUSG000 | 3743.30103 | -1.3017985   | 0.16239443 | -7.9762067 | 1.51E-15 | 5.81E-12 |
| ENSMUSG000 | 287.027636 | -1.1466146   | 0.15253727 | -7.5028921 | 6.24E-14 | 1.44E-10 |
| ENSMUSG000 | 1294.55037 | -1.1234054   | 0.14945014 | -7.5188501 | 5.53E-14 | 1.44E-10 |
| ENSMUSG000 | 1191.72975 | -1.5453672   | 0.20585522 | -7.4069901 | 1.29E-13 | 2.49E-10 |
| ENSMUSG000 | 664.816894 | -1.0714515   | 0.16217413 | -6.594148  | 4.28E-11 | 7.05E-08 |
| ENSMUSG000 | 253.678685 | 1.57247195   | 0.24567601 | 6.54100217 | 6.11E-11 | 8.82E-08 |
| ENSMUSG000 | 1351.85289 | 1.01301931   | 0.15502881 | 6.52046534 | 7.01E-11 | 8.99E-08 |
| ENSMUSG000 | 2650.12202 | -1.1618648   | 0.18020054 | -6.3775545 | 1.80E-10 | 2.08E-07 |
| ENSMUSG000 | 409.652367 | 1.30993852   | 0.21331748 | 6.02242508 | 1.72E-09 | 1.80E-06 |
| ENSMUSG000 | 509.638449 | -1.2507619   | 0.2084572  | -5.8936782 | 3.78E-09 | 3.63E-06 |
| ENSMUSG000 | 111.447273 | 1.19203727   | 0.25777121 | 5.62530307 | 1.85E-08 | 1.64E-05 |
| ENSMUSG000 | 199.843911 | -1.0456421   | 0.18630693 | -5.5769025 | 2.45E-08 | 2.02E-05 |
| ENSMUSG000 | 1058.30306 | -1.0036184   | 0.18065867 | -5.5597711 | 2.70E-08 | 2.08E-05 |
| ENSMUSG000 | 2600.93296 | -0.9492725   | 0.17221899 | -5.487186  | 4.08E-08 | 2.90E-05 |
| ENSMUSG000 | 900.270806 | 0.84833074   | 0.15444605 | 5.47954617 | 4.26E-08 | 2.90E-05 |
| ENSMUSG000 | 201.483893 | -1.2673514   | 0.228571   | -5.4465357 | 5.14E-08 | 3.29E-05 |
| ENSMUSG000 | 1006.06657 | -0.9495676   | 0.175536   | -5.3244618 | 1.01E-07 | 5.31E-05 |
| ENSMUSG000 | 100.205273 | -1.0555913   | 0.19435667 | -5.3315367 | 9.74E-08 | 5.31E-05 |
| ENSMUSG000 | 1389.47138 | -1.1166057   | 0.20718241 | -5.3422831 | 9.18E-08 | 5.31E-05 |
| ENSMUSG000 | 829.295897 | 0.81183484   | 0.15051444 | 5.3325019  | 9.69E-08 | 5.31E-05 |
| ENSMUSG000 | 246.200008 | -0.8593199   | 0.16325471 | -5.2669334 | 1.39E-07 | 6.96E-05 |
| ENSMUSG000 | 484.703069 | -0.9642536   | 0.18292961 | -5.2095454 | 1.89E-07 | 8.09E-05 |
| ENSMUSG000 | 94.0701907 | 1.3655166    | 0.25544042 | 5.22645425 | 1.73E-07 | 8.09E-05 |
| ENSMUSG000 | 233.7594   | 0.85025361   | 0.16307992 | 5.21431884 | 1.84E-07 | 8.09E-05 |
| ENSMUSG000 | 2927.17942 | -0.9659872   | 0.18378181 | -5.2183127 | 1.81E-07 | 8.09E-05 |
| ENSMUSG000 | 170.563763 | 0.94704631   | 0.17994494 | 5.1916539  | 2.08E-07 | 8.59E-05 |
| ENSMUSG000 | 415.940065 | -0.924273    | 0.17881356 | -5.1076828 | 3.26E-07 | 1.30E-04 |
| ENSMUSG000 | 686.424431 | -0.8940379   | 0.17496165 | -5.0711261 | 3.95E-07 | 1.52E-04 |
| ENSMUSG000 | 56.7916214 | -0.075688    | 0.0822969  | -5.0487678 | 4.45E-07 | 1.66E-04 |
| ENSMUSG000 | 2875.14862 | -0.5082321   | 0.10157231 | -5.0071866 | 5.52E-07 | 1.99E-04 |
| ENSMUSG000 | 985.046119 | -0.9636999   | 0.18980639 | -4.9515655 | 7.36E-07 | 2.56E-04 |
| ENSMUSG000 | 753.078837 | -0.9781353   | 0.19576897 | -4.9469051 | 7.54E-07 | 2.56E-04 |
| ENSMUSG000 | 836.706111 | 0.82123288   | 0.16363857 | 4.93304013 | 8.10E-07 | 2.67E-04 |
| ENSMUSG000 | 151.020858 | -0.8983502   | 0.18492688 | -4.9090592 | 9.15E-07 | 2.93E-04 |
| ENSMUSG000 | 1208.59777 | -0.577831    | 0.11733033 | -4.8795825 | 1.06E-06 | 3.32E-04 |
| ENSMUSG000 | 381.08158  | -0.8568933   | 0.17509544 | -4.8443649 | 1.27E-06 | 3.58E-04 |
| ENSMUSG000 | 197.420071 | -0.8411195   | 0.17436033 | -4.8446398 | 1.27E-06 | 3.58E-04 |
| ENSMUSG000 | 66.5041813 | -1.1455164   | 0.25068317 | -4.8564946 | 1.19E-06 | 3.58E-04 |

|            |            |            |            |            |          |            |
|------------|------------|------------|------------|------------|----------|------------|
| ENSMUSG00( | 47.7410847 | 1.12073222 | 0.23457523 | 4.84735044 | 1.25E-06 | 3.58E-04   |
| ENSMUSG00( | 3823.66715 | -0.8309409 | 0.16785779 | -4.8226497 | 1.42E-06 | 3.89E-04   |
| ENSMUSG00( | 942.287657 | -0.9122895 | 0.19125032 | -4.7863508 | 1.70E-06 | 4.56E-04   |
| ENSMUSG00( | 4073.57767 | -0.5838595 | 0.12234343 | -4.7641289 | 1.90E-06 | 4.98E-04   |
| ENSMUSG00( | 752.75992  | -0.5732675 | 0.11977053 | -4.7543801 | 1.99E-06 | 5.11E-04   |
| ENSMUSG00( | 651.333066 | -0.6042666 | 0.12933202 | -4.6941609 | 2.68E-06 | 6.72E-04   |
| ENSMUSG00( | 172.527296 | 0.95595486 | 0.20805405 | 4.66785194 | 3.04E-06 | 7.48E-04   |
| ENSMUSG00( | 1008.67576 | -0.9160822 | 0.19508351 | -4.5539827 | 5.26E-06 | 0.00126598 |
| ENSMUSG00( | 465.509179 | -0.9426996 | 0.20353726 | -4.5343994 | 5.78E-06 | 0.00128244 |
| ENSMUSG00( | 1640.72161 | -0.5837182 | 0.12917753 | -4.5467527 | 5.45E-06 | 0.00128244 |
| ENSMUSG00( | 1343.76022 | -0.7827663 | 0.16942958 | -4.5374247 | 5.69E-06 | 0.00128244 |
| ENSMUSG00( | 118.199597 | 0.91667343 | 0.2081812  | 4.53827108 | 5.67E-06 | 0.00128244 |
| ENSMUSG00( | 1258.42311 | -0.9576664 | 0.20776175 | -4.4813614 | 7.42E-06 | 0.00161547 |
| ENSMUSG00( | 1157.16611 | -0.6352579 | 0.1433526  | -4.4629996 | 8.08E-06 | 0.00172776 |
| ENSMUSG00( | 1940.00969 | -0.6188852 | 0.13652579 | -4.4343831 | 9.23E-06 | 0.00193806 |
| ENSMUSG00( | 1985.20312 | -0.569186  | 0.12897792 | -4.4138039 | 1.02E-05 | 0.00209379 |
| ENSMUSG00( | 2757.69389 | -0.7718479 | 0.17457484 | -4.4047829 | 1.06E-05 | 0.00214455 |
| ENSMUSG00( | 6873.81955 | -0.7620488 | 0.17246865 | -4.3997625 | 1.08E-05 | 0.00215693 |
| ENSMUSG00( | 2835.02267 | -0.8390173 | 0.188648   | -4.3867837 | 1.15E-05 | 0.00225087 |
| ENSMUSG00( | 220.941121 | -0.8711119 | 0.19478164 | -4.3763273 | 1.21E-05 | 0.00232219 |
| ENSMUSG00( | 1828.09225 | -0.8339128 | 0.18726    | -4.3718174 | 1.23E-05 | 0.00233182 |
| ENSMUSG00( | 1009.6523  | -0.5380481 | 0.12310368 | -4.3645692 | 1.27E-05 | 0.00237161 |
| ENSMUSG00( | 502.837574 | -0.7153196 | 0.16529774 | -4.3560762 | 1.32E-05 | 0.00238843 |
| ENSMUSG00( | 52.5981727 | 1.08442822 | 0.24376369 | 4.35865328 | 1.31E-05 | 0.00238843 |
| ENSMUSG00( | 725.793211 | -0.6508207 | 0.15004371 | -4.3359019 | 1.45E-05 | 0.00246732 |
| ENSMUSG00( | 136.865873 | 0.72391754 | 0.16823034 | 4.33563826 | 1.45E-05 | 0.00246732 |
| ENSMUSG00( | 558.104401 | -0.8449507 | 0.19284972 | -4.3382317 | 1.44E-05 | 0.00246732 |
| ENSMUSG00( | 756.510494 | -0.8467018 | 0.20192397 | -4.33933   | 1.43E-05 | 0.00246732 |
| ENSMUSG00( | 221.393396 | 0.71450152 | 0.16350658 | 4.32771367 | 1.51E-05 | 0.00252069 |
| ENSMUSG00( | 262.66     | 0.91094383 | 0.20878005 | 4.30310113 | 1.68E-05 | 0.00277755 |
| ENSMUSG00( | 889.101018 | -1.030042  | 0.24227415 | -4.2949798 | 1.75E-05 | 0.00284063 |
| ENSMUSG00( | 234.43819  | -0.6417451 | 0.14810919 | -4.2799247 | 1.87E-05 | 0.00287764 |
| ENSMUSG00( | 416.906305 | 0.77188329 | 0.17912146 | 4.2840797  | 1.83E-05 | 0.00287764 |
| ENSMUSG00( | 334.126695 | -1.0573859 | 0.24770636 | -4.281973  | 1.85E-05 | 0.00287764 |
| ENSMUSG00( | 230.522636 | -0.6967304 | 0.15978605 | -4.2878902 | 1.80E-05 | 0.00287764 |
| ENSMUSG00( | 3246.86718 | 0.61805907 | 0.1439836  | 4.26493534 | 2.00E-05 | 0.00303729 |
| ENSMUSG00( | 569.749728 | -0.694682  | 0.16200699 | -4.2472618 | 2.16E-05 | 0.0032443  |
| ENSMUSG00( | 980.440974 | 0.71896151 | 0.1662771  | 4.24201176 | 2.22E-05 | 0.00327857 |
| ENSMUSG00( | 114.945585 | 0.85036558 | 0.19891242 | 4.22227637 | 2.42E-05 | 0.00353403 |
| ENSMUSG00( | 304.076484 | -0.6063934 | 0.14364978 | -4.217972  | 2.47E-05 | 0.00355713 |
| ENSMUSG00( | 255.447193 | -0.6794127 | 0.16076858 | -4.1881665 | 2.81E-05 | 0.00400786 |

|            |            |            |            |            |          |            |
|------------|------------|------------|------------|------------|----------|------------|
| ENSMUSG00( | 474.34719  | -0.8965073 | 0.22594973 | -4.1809226 | 2.90E-05 | 0.00403802 |
| ENSMUSG00( | 2475.38747 | -0.7752274 | 0.17860788 | -4.1829246 | 2.88E-05 | 0.00403802 |
| ENSMUSG00( | 123.982918 | 1.07052499 | 0.24858809 | 4.16943152 | 3.05E-05 | 0.00414715 |
| ENSMUSG00( | 162.817138 | 0.9772793  | 0.24366479 | 4.17019139 | 3.04E-05 | 0.00414715 |
| ENSMUSG00( | 283.712502 | -0.9377255 | 0.22521212 | -4.1393438 | 3.48E-05 | 0.00467533 |
| ENSMUSG00( | 409.741133 | 0.75603653 | 0.18070195 | 4.131438   | 3.61E-05 | 0.00478347 |
| ENSMUSG00( | 229.620294 | 0.80176849 | 0.19117723 | 4.12511656 | 3.71E-05 | 0.0048609  |
| ENSMUSG00( | 1671.58379 | -0.6697034 | 0.15764712 | -4.1162947 | 3.85E-05 | 0.00499391 |
| ENSMUSG00( | 1735.32182 | -0.6372695 | 0.1514494  | -4.0924373 | 4.27E-05 | 0.0052986  |
| ENSMUSG00( | 345.331434 | -0.6322398 | 0.15374265 | -4.0936407 | 4.25E-05 | 0.0052986  |
| ENSMUSG00( | 80.0406292 | 0.89732544 | 0.21942109 | 4.09768321 | 4.17E-05 | 0.0052986  |
| ENSMUSG00( | 2075.50838 | -0.6966101 | 0.16276318 | -4.0944347 | 4.23E-05 | 0.0052986  |
| ENSMUSG00( | 152.989696 | 0.94793534 | 0.22780046 | 4.08263988 | 4.45E-05 | 0.00546829 |
| ENSMUSG00( | 200.832088 | 0.69622513 | 0.1698958  | 4.07771014 | 4.55E-05 | 0.00552671 |
| ENSMUSG00( | 159.336144 | 0.65198616 | 0.1614354  | 4.03681902 | 5.42E-05 | 0.00651525 |
| ENSMUSG00( | 207.880183 | -0.726425  | 0.17953414 | -4.0304729 | 5.57E-05 | 0.00662468 |
| ENSMUSG00( | 1493.1288  | -0.6132287 | 0.15221609 | -4.0057087 | 6.18E-05 | 0.00728353 |
| ENSMUSG00( | 2582.03313 | -0.4798174 | 0.12042532 | -3.9837236 | 6.78E-05 | 0.00770892 |
| ENSMUSG00( | 2712.46958 | -0.416845  | 0.10379326 | -3.9814884 | 6.85E-05 | 0.00770892 |
| ENSMUSG00( | 746.682346 | -0.7457313 | 0.18525597 | -3.9784764 | 6.94E-05 | 0.00770892 |
| ENSMUSG00( | 92.4820003 | -0.7932423 | 0.19528203 | -3.9849605 | 6.75E-05 | 0.00770892 |
| ENSMUSG00( | 273.482812 | 0.57890532 | 0.14465876 | 3.97837504 | 6.94E-05 | 0.00770892 |
| ENSMUSG00( | 301.028256 | 0.65483675 | 0.16535203 | 3.97816299 | 6.94E-05 | 0.00770892 |
| ENSMUSG00( | 198.003476 | -0.6787736 | 0.17033538 | -3.97257   | 7.11E-05 | 0.00781708 |
| ENSMUSG00( | 614.550276 | -0.5769915 | 0.1428572  | -3.9601057 | 7.49E-05 | 0.00815884 |
| ENSMUSG00( | 245.945351 | -0.7626668 | 0.19963533 | -3.9546278 | 7.67E-05 | 0.00827002 |
| ENSMUSG00( | 516.951429 | -0.5744499 | 0.14537101 | -3.9510782 | 7.78E-05 | 0.00831595 |
| ENSMUSG00( | 2814.6885  | -0.5432157 | 0.13669662 | -3.9456143 | 7.96E-05 | 0.0083532  |
| ENSMUSG00( | 228.145653 | -0.6831498 | 0.16943993 | -3.9458127 | 7.95E-05 | 0.0083532  |
| ENSMUSG00( | 127.420986 | -0.7491923 | 0.18783143 | -3.9398959 | 8.15E-05 | 0.00847585 |
| ENSMUSG00( | 547.796999 | -0.6847919 | 0.17600688 | -3.9352892 | 8.31E-05 | 0.00847585 |
| ENSMUSG00( | 454.559442 | -0.7719064 | 0.19257844 | -3.931976  | 8.43E-05 | 0.00847585 |
| ENSMUSG00( | 393.03572  | -0.5190864 | 0.12934496 | -3.9295113 | 8.51E-05 | 0.00847585 |
| ENSMUSG00( | 60.0953612 | -1.0612372 | 0.25790265 | -3.9293674 | 8.52E-05 | 0.00847585 |
| ENSMUSG00( | 9901.89544 | -0.5135941 | 0.12856601 | -3.9338664 | 8.36E-05 | 0.00847585 |
| ENSMUSG00( | 2771.29285 | 0.42046058 | 0.10684169 | 3.89866803 | 9.67E-05 | 0.00903907 |
| ENSMUSG00( | 2035.90333 | -0.5463547 | 0.14034973 | -3.9048002 | 9.43E-05 | 0.00903907 |
| ENSMUSG00( | 309.968385 | 0.90870433 | 0.22857024 | 3.91013326 | 9.22E-05 | 0.00903907 |
| ENSMUSG00( | 192.931184 | 0.67010223 | 0.17081137 | 3.90371583 | 9.47E-05 | 0.00903907 |
| ENSMUSG00( | 44.306847  | -0.926777  | 0.2328185  | -3.8977432 | 9.71E-05 | 0.00903907 |
| ENSMUSG00( | 1965.19662 | -0.7027873 | 0.17461745 | -3.9074764 | 9.33E-05 | 0.00903907 |

|            |            |            |            |            |          |            |
|------------|------------|------------|------------|------------|----------|------------|
| ENSMUSG00( | 429.984965 | -0.522264  | 0.13265377 | -3.900564  | 9.60E-05 | 0.00903907 |
| ENSMUSG00( | 726.484881 | -0.650136  | 0.1616733  | -3.9019362 | 9.54E-05 | 0.00903907 |
| ENSMUSG00( | 689.795563 | -0.6430375 | 0.16388998 | -3.8905112 | 1.00E-04 | 0.00923827 |
| ENSMUSG00( | 298.537374 | -0.8460709 | 0.21476736 | -3.8824546 | 1.03E-04 | 0.00947408 |
| ENSMUSG00( | 433.208619 | -0.5934192 | 0.15334749 | -3.8804786 | 1.04E-04 | 0.00947618 |
| ENSMUSG00( | 808.903307 | -0.450514  | 0.1163865  | -3.8706494 | 1.09E-04 | 0.00978948 |
| ENSMUSG00( | 663.353267 | -0.6535851 | 0.16716243 | -3.8590664 | 1.14E-04 | 0.01003565 |
| ENSMUSG00( | 198.694099 | -0.754334  | 0.19219969 | -3.8570733 | 1.15E-04 | 0.01003565 |
| ENSMUSG00( | 379.623736 | -0.7010345 | 0.18280585 | -3.858432  | 1.14E-04 | 0.01003565 |
| ENSMUSG00( | 977.333451 | -0.8811019 | 0.22180016 | -3.858088  | 1.14E-04 | 0.01003565 |
| ENSMUSG00( | 169.610985 | 0.6488055  | 0.16736295 | 3.85006525 | 1.18E-04 | 0.01013692 |
| ENSMUSG00( | 46.3354326 | 0.91465857 | 0.23223364 | 3.85062559 | 1.18E-04 | 0.01013692 |
| ENSMUSG00( | 149.620214 | 0.74714753 | 0.1947342  | 3.84911562 | 1.19E-04 | 0.01013692 |
| ENSMUSG00( | 451.392642 | -0.6939087 | 0.18028351 | -3.8436283 | 1.21E-04 | 0.01021506 |
| ENSMUSG00( | 292.752208 | -0.7755761 | 0.18969547 | -3.8440717 | 1.21E-04 | 0.01021506 |
| ENSMUSG00( | 378.833414 | -0.5797942 | 0.1510689  | -3.8389778 | 1.24E-04 | 0.01033503 |
| ENSMUSG00( | 79.2110221 | 0.7696632  | 0.19690316 | 3.83355223 | 1.26E-04 | 0.01040142 |
| ENSMUSG00( | 756.291208 | 0.57961223 | 0.14840165 | 3.83211874 | 1.27E-04 | 0.01040142 |
| ENSMUSG00( | 52.603779  | -0.8891753 | 0.23009665 | -3.8334625 | 1.26E-04 | 0.01040142 |
| ENSMUSG00( | 93.1649245 | 0.82675993 | 0.21088333 | 3.82504967 | 1.31E-04 | 0.01062908 |
| ENSMUSG00( | 2208.27006 | -0.5341165 | 0.13867221 | -3.8213493 | 1.33E-04 | 0.01064    |
| ENSMUSG00( | 268.028648 | -0.6196173 | 0.16335117 | -3.8214648 | 1.33E-04 | 0.01064    |
| ENSMUSG00( | 243.685094 | -0.5720995 | 0.15153698 | -3.8033157 | 1.43E-04 | 0.01136664 |
| ENSMUSG00( | 190.377932 | 0.62080802 | 0.16307843 | 3.79788816 | 1.46E-04 | 0.01138286 |
| ENSMUSG00( | 73.8146331 | 0.85670003 | 0.22510927 | 3.79937206 | 1.45E-04 | 0.01138286 |
| ENSMUSG00( | 426.410459 | 0.55696174 | 0.14628552 | 3.79910013 | 1.45E-04 | 0.01138286 |
| ENSMUSG00( | 118.114808 | 0.75537927 | 0.19842464 | 3.79582544 | 1.47E-04 | 0.0114009  |
| ENSMUSG00( | 283.715955 | -0.9847236 | 0.25275347 | -3.7814294 | 1.56E-04 | 0.01170407 |
| ENSMUSG00( | 409.362515 | -0.513255  | 0.13411183 | -3.7858775 | 1.53E-04 | 0.01170407 |
| ENSMUSG00( | 1750.04006 | -0.6470683 | 0.16659284 | -3.7811024 | 1.56E-04 | 0.01170407 |
| ENSMUSG00( | 301.087643 | -0.5286336 | 0.14018734 | -3.7812015 | 1.56E-04 | 0.01170407 |
| ENSMUSG00( | 433.953988 | 0.4798153  | 0.12599974 | 3.78504059 | 1.54E-04 | 0.01170407 |
| ENSMUSG00( | 208.578601 | 0.95181055 | 0.22209168 | 3.7738653  | 1.61E-04 | 0.01189458 |
| ENSMUSG00( | 2050.83415 | 0.4399966  | 0.11494573 | 3.77395251 | 1.61E-04 | 0.01189458 |
| ENSMUSG00( | 98.7520633 | 0.86839729 | 0.22855338 | 3.76684141 | 1.65E-04 | 0.0121562  |
| ENSMUSG00( | 350.398854 | 0.56047107 | 0.14907273 | 3.76374823 | 1.67E-04 | 0.01222973 |
| ENSMUSG00( | 6432.8246  | -0.7734994 | 0.19978599 | -3.7573837 | 1.72E-04 | 0.012466   |
| ENSMUSG00( | 879.462729 | -0.6108142 | 0.16173807 | -3.7539029 | 1.74E-04 | 0.01256148 |
| ENSMUSG00( | 309.487738 | 0.71925562 | 0.18917174 | 3.74239128 | 1.82E-04 | 0.01299467 |
| ENSMUSG00( | 1071.80157 | -0.6579693 | 0.17023879 | -3.7422807 | 1.82E-04 | 0.01299467 |
| ENSMUSG00( | 99.1319171 | -0.76181   | 0.20392306 | -3.7327192 | 1.89E-04 | 0.01341538 |

|            |            |            |            |            |          |            |
|------------|------------|------------|------------|------------|----------|------------|
| ENSMUSG00( | 145.291724 | 0.79858411 | 0.21231194 | 3.7289166  | 1.92E-04 | 0.01353638 |
| ENSMUSG00( | 202.671338 | 0.81103207 | 0.21047925 | 3.72567887 | 1.95E-04 | 0.01362824 |
| ENSMUSG00( | 1030.96906 | -0.4983229 | 0.13406503 | -3.7230235 | 1.97E-04 | 0.01368946 |
| ENSMUSG00( | 1143.99124 | -0.5374802 | 0.14520424 | -3.7139341 | 2.04E-04 | 0.013939   |
| ENSMUSG00( | 417.481963 | -0.6137572 | 0.16387592 | -3.714759  | 2.03E-04 | 0.013939   |
| ENSMUSG00( | 504.828602 | -0.8568949 | 0.22275408 | -3.7163644 | 2.02E-04 | 0.013939   |
| ENSMUSG00( | 298.649531 | -0.7293871 | 0.19390639 | -3.7033205 | 2.13E-04 | 0.01436558 |
| ENSMUSG00( | 571.210023 | 0.6684265  | 0.17791081 | 3.70437931 | 2.12E-04 | 0.01436558 |
| ENSMUSG00( | 402.295122 | 0.67448865 | 0.17868484 | 3.69868277 | 2.17E-04 | 0.01442042 |
| ENSMUSG00( | 69.7594483 | 0.85206942 | 0.23493795 | 3.69794083 | 2.17E-04 | 0.01442042 |
| ENSMUSG00( | 367.11303  | -0.7971462 | 0.20739956 | -3.6990595 | 2.16E-04 | 0.01442042 |
| ENSMUSG00( | 86.5778878 | -0.7782449 | 0.20450166 | -3.6959996 | 2.19E-04 | 0.01444803 |
| ENSMUSG00( | 464.562997 | 0.7409014  | 0.19476949 | 3.69048269 | 2.24E-04 | 0.01461125 |
| ENSMUSG00( | 607.719402 | -0.5851452 | 0.15601642 | -3.6902554 | 2.24E-04 | 0.01461125 |
| ENSMUSG00( | 733.087256 | -0.5042581 | 0.1365543  | -3.6860065 | 2.28E-04 | 0.01477376 |
| ENSMUSG00( | 107.63712  | 0.85272766 | 0.23749856 | 3.68298252 | 2.31E-04 | 0.01486667 |
| ENSMUSG00( | 267.677748 | -0.7150254 | 0.19142702 | -3.6806733 | 2.33E-04 | 0.01491863 |
| ENSMUSG00( | 134.375187 | -0.6944845 | 0.18795598 | -3.6743169 | 2.38E-04 | 0.0150863  |
| ENSMUSG00( | 242.188757 | -0.6448533 | 0.16879038 | -3.6736033 | 2.39E-04 | 0.0150863  |
| ENSMUSG00( | 227.887055 | -0.7660625 | 0.20593768 | -3.6744971 | 2.38E-04 | 0.0150863  |
| ENSMUSG00( | 851.698666 | -0.7020383 | 0.18725464 | -3.6580426 | 2.54E-04 | 0.01544155 |
| ENSMUSG00( | 221.406157 | 0.67121483 | 0.18538265 | 3.65840423 | 2.54E-04 | 0.01544155 |
| ENSMUSG00( | 1242.38248 | -0.6083741 | 0.16417862 | -3.6592034 | 2.53E-04 | 0.01544155 |
| ENSMUSG00( | 275.995125 | 0.76049007 | 0.21182244 | 3.65829866 | 2.54E-04 | 0.01544155 |
| ENSMUSG00( | 514.693365 | -0.5631131 | 0.15184693 | -3.6624018 | 2.50E-04 | 0.01544155 |
| ENSMUSG00( | 236.134849 | 0.66604536 | 0.1817006  | 3.66422044 | 2.48E-04 | 0.01544155 |
| ENSMUSG00( | 2966.55932 | -0.5203869 | 0.13914721 | -3.6649639 | 2.47E-04 | 0.01544155 |
| ENSMUSG00( | 252.576284 | 0.68140828 | 0.24507877 | 3.65294223 | 2.59E-04 | 0.01566917 |
| ENSMUSG00( | 494.854795 | 0.46082492 | 0.12428681 | 3.65070893 | 2.62E-04 | 0.01572374 |
| ENSMUSG00( | 201.000771 | -0.8567288 | 0.23003087 | -3.6459711 | 2.66E-04 | 0.01588148 |
| ENSMUSG00( | 26264.0511 | -0.3477466 | 0.0957691  | -3.6445531 | 2.68E-04 | 0.01588148 |
| ENSMUSG00( | 721.916674 | -0.4867035 | 0.1336091  | -3.6432182 | 2.69E-04 | 0.01588148 |
| ENSMUSG00( | 390.176647 | -0.5951575 | 0.15961241 | -3.6428423 | 2.70E-04 | 0.01588148 |
| ENSMUSG00( | 481.450044 | -0.5467822 | 0.15133728 | -3.6348149 | 2.78E-04 | 0.01630108 |
| ENSMUSG00( | 818.54931  | 0.658436   | 0.17704399 | 3.63168741 | 2.82E-04 | 0.01641662 |
| ENSMUSG00( | 4434.65085 | 0.43861436 | 0.12043064 | 3.62882448 | 2.85E-04 | 0.01651632 |
| ENSMUSG00( | 358.770582 | 0.55850013 | 0.15502489 | 3.62139532 | 2.93E-04 | 0.01691302 |
| ENSMUSG00( | 1320.98149 | -0.4557812 | 0.1275881  | -3.6188972 | 2.96E-04 | 0.01699214 |
| ENSMUSG00( | 494.598611 | 0.53333117 | 0.14589611 | 3.6155004  | 3.00E-04 | 0.01704691 |
| ENSMUSG00( | 1895.02346 | -0.8036312 | 0.21482547 | -3.6160622 | 2.99E-04 | 0.01704691 |
| ENSMUSG00( | 440.743165 | -0.628275  | 0.175619   | -3.6114631 | 3.04E-04 | 0.01722967 |

|            |            |            |            |            |          |            |
|------------|------------|------------|------------|------------|----------|------------|
| ENSMUSG00( | 536.240325 | -0.6295502 | 0.17414745 | -3.6024038 | 3.15E-04 | 0.01775456 |
| ENSMUSG00( | 223.469967 | -0.637622  | 0.17153466 | -3.6000667 | 3.18E-04 | 0.01782794 |
| ENSMUSG00( | 501.392714 | -0.6293232 | 0.174595   | -3.5980877 | 3.21E-04 | 0.01787734 |
| ENSMUSG00( | 74.6115487 | 0.87987471 | 0.24843741 | 3.59142774 | 3.29E-04 | 0.01817994 |
| ENSMUSG00( | 1850.19752 | 0.50129892 | 0.13767557 | 3.59121398 | 3.29E-04 | 0.01817994 |
| ENSMUSG00( | 1053.87025 | -0.3656499 | 0.10207162 | -3.5733498 | 3.52E-04 | 0.01857812 |
| ENSMUSG00( | 516.440638 | -0.4213671 | 0.11709182 | -3.582235  | 3.41E-04 | 0.01857812 |
| ENSMUSG00( | 98.5902305 | 0.80044842 | 0.22578376 | 3.57954011 | 3.44E-04 | 0.01857812 |
| ENSMUSG00( | 101.549947 | 0.71238898 | 0.1992612  | 3.57348337 | 3.52E-04 | 0.01857812 |
| ENSMUSG00( | 1229.88226 | -0.8004812 | 0.21742824 | -3.5752496 | 3.50E-04 | 0.01857812 |
| ENSMUSG00( | 191.588574 | -0.9242698 | 0.25802124 | -3.5747722 | 3.51E-04 | 0.01857812 |
| ENSMUSG00( | 474.768976 | -0.6488167 | 0.17936032 | -3.5807603 | 3.43E-04 | 0.01857812 |
| ENSMUSG00( | 183.03396  | 0.64384401 | 0.18060991 | 3.5785516  | 3.46E-04 | 0.01857812 |
| ENSMUSG00( | 1953.99259 | -0.4977011 | 0.1361107  | -3.5755633 | 3.49E-04 | 0.01857812 |
| ENSMUSG00( | 159.087297 | 0.79638766 | 0.21570161 | 3.57421756 | 3.51E-04 | 0.01857812 |
| ENSMUSG00( | 962.766768 | -0.7752957 | 0.21030721 | -3.5689335 | 3.58E-04 | 0.01872308 |
| ENSMUSG00( | 809.410066 | -0.6133313 | 0.17002368 | -3.5695522 | 3.58E-04 | 0.01872308 |
| ENSMUSG00( | 95.9188019 | 0.90310274 | 0.24478424 | 3.56622759 | 3.62E-04 | 0.01883216 |
| ENSMUSG00( | 1430.50438 | -0.4295812 | 0.11904028 | -3.5593899 | 3.72E-04 | 0.01924262 |
| ENSMUSG00( | 2983.92658 | -0.5619006 | 0.15420396 | -3.5497147 | 3.86E-04 | 0.01961203 |
| ENSMUSG00( | 381.503915 | 0.66947326 | 0.18542939 | 3.55317257 | 3.81E-04 | 0.01961203 |
| ENSMUSG00( | 1935.67083 | -0.4455488 | 0.12439795 | -3.5506159 | 3.84E-04 | 0.01961203 |
| ENSMUSG00( | 567.312357 | 0.5792438  | 0.16270162 | 3.55113723 | 3.84E-04 | 0.01961203 |
| ENSMUSG00( | 1219.82078 | -0.479274  | 0.13484129 | -3.5451891 | 3.92E-04 | 0.01981687 |
| ENSMUSG00( | 759.093128 | -0.5860146 | 0.16550175 | -3.5412341 | 3.98E-04 | 0.01981687 |
| ENSMUSG00( | 391.420897 | 0.74296808 | 0.20878709 | 3.54128077 | 3.98E-04 | 0.01981687 |
| ENSMUSG00( | 258.336969 | -0.575476  | 0.16214851 | -3.542864  | 3.96E-04 | 0.01981687 |
| ENSMUSG00( | 1229.67545 | -0.439494  | 0.12153854 | -3.5416627 | 3.98E-04 | 0.01981687 |
| ENSMUSG00( | 2499.14313 | -0.6373912 | 0.17752064 | -3.5358696 | 4.06E-04 | 0.02013686 |
| ENSMUSG00( | 780.193021 | -0.6859852 | 0.19159219 | -3.5326411 | 4.11E-04 | 0.02021087 |
| ENSMUSG00( | 508.761329 | -0.4652332 | 0.13126354 | -3.5327455 | 4.11E-04 | 0.02021087 |
| ENSMUSG00( | 687.157769 | 0.46967172 | 0.13113281 | 3.52648428 | 4.21E-04 | 0.02051209 |
| ENSMUSG00( | 105.670949 | 0.76389776 | 0.2239248  | 3.52651385 | 4.21E-04 | 0.02051209 |
| ENSMUSG00( | 107.757698 | 0.82024926 | 0.23172732 | 3.51999907 | 4.32E-04 | 0.02078367 |
| ENSMUSG00( | 1736.53503 | 0.42680297 | 0.1202449  | 3.51914746 | 4.33E-04 | 0.02078367 |
| ENSMUSG00( | 1765.13007 | -0.6508997 | 0.17811281 | -3.5185615 | 4.34E-04 | 0.02078367 |
| ENSMUSG00( | 50.1064929 | 0.78294427 | 0.22862684 | 3.51969439 | 4.32E-04 | 0.02078367 |
| ENSMUSG00( | 233.65673  | -0.7598501 | 0.21211998 | -3.5119642 | 4.45E-04 | 0.02121844 |
| ENSMUSG00( | 607.58466  | 0.72207807 | 0.20104246 | 3.51082362 | 4.47E-04 | 0.02122199 |
| ENSMUSG00( | 52.1541554 | 0.88501356 | 0.24975819 | 3.5081927  | 4.51E-04 | 0.02134515 |
| ENSMUSG00( | 311.860321 | 0.67958533 | 0.19044798 | 3.50207278 | 4.62E-04 | 0.02175236 |

|            |            |            |            |            |          |            |
|------------|------------|------------|------------|------------|----------|------------|
| ENSMUSG00( | 420.300833 | -0.689482  | 0.19472277 | -3.5002885 | 4.65E-04 | 0.02180947 |
| ENSMUSG00( | 491.404181 | -0.6052902 | 0.16919404 | -3.4973584 | 4.70E-04 | 0.02196118 |
| ENSMUSG00( | 94.2819283 | -0.6776112 | 0.18899751 | -3.4916351 | 4.80E-04 | 0.02228881 |
| ENSMUSG00( | 287.404982 | -0.5840101 | 0.16336053 | -3.4912524 | 4.81E-04 | 0.02228881 |
| ENSMUSG00( | 374.633452 | -0.5256753 | 0.15089141 | -3.4895979 | 4.84E-04 | 0.02229848 |
| ENSMUSG00( | 2119.00379 | -0.5624095 | 0.15493486 | -3.488846  | 4.85E-04 | 0.02229848 |
| ENSMUSG00( | 173.684095 | -0.7281036 | 0.20401185 | -3.4879356 | 4.87E-04 | 0.02229848 |
| ENSMUSG00( | 183.014224 | 0.66769196 | 0.1926873  | 3.48624588 | 4.90E-04 | 0.02235112 |
| ENSMUSG00( | 1055.07466 | -0.8049253 | 0.22478551 | -3.4817453 | 4.98E-04 | 0.02264066 |
| ENSMUSG00( | 454.715434 | 0.57303744 | 0.1666545  | 3.47924569 | 5.03E-04 | 0.02276329 |
| ENSMUSG00( | 55.8337476 | 0.91228647 | 0.25924763 | 3.47499254 | 5.11E-04 | 0.0229473  |
| ENSMUSG00( | 446.574724 | -0.4816857 | 0.13907218 | -3.4752949 | 5.10E-04 | 0.0229473  |
| ENSMUSG00( | 1579.20301 | -0.3865372 | 0.11090183 | -3.473003  | 5.15E-04 | 0.02302847 |
| ENSMUSG00( | 351.542753 | 0.55307183 | 0.15881423 | 3.46824266 | 5.24E-04 | 0.02331902 |
| ENSMUSG00( | 273.549693 | -0.5917961 | 0.16857918 | -3.4675617 | 5.25E-04 | 0.02331902 |
| ENSMUSG00( | 65.3377994 | 0.72811584 | 0.20927381 | 3.46578837 | 5.29E-04 | 0.02338342 |
| ENSMUSG00( | 84.8110181 | -0.7551585 | 0.20763297 | -3.4561897 | 5.48E-04 | 0.02413972 |
| ENSMUSG00( | 146.53343  | 0.64082452 | 0.18339993 | 3.45136154 | 5.58E-04 | 0.02448232 |
| ENSMUSG00( | 845.458375 | -0.5873567 | 0.17122455 | -3.4463479 | 5.68E-04 | 0.02484664 |
| ENSMUSG00( | 261.008343 | -0.7576768 | 0.21745084 | -3.443694  | 5.74E-04 | 0.02490314 |
| ENSMUSG00( | 350.037899 | -0.5392468 | 0.15564283 | -3.4437221 | 5.74E-04 | 0.02490314 |
| ENSMUSG00( | 1132.80541 | -0.4717025 | 0.13742121 | -3.4360678 | 5.90E-04 | 0.02551887 |
| ENSMUSG00( | 2345.79564 | -0.4658272 | 0.13338174 | -3.4276506 | 6.09E-04 | 0.02622506 |
| ENSMUSG00( | 570.809543 | -0.5273809 | 0.15317757 | -3.4254488 | 6.14E-04 | 0.02634025 |
| ENSMUSG00( | 330.408715 | 0.55010058 | 0.15655873 | 3.42425183 | 6.16E-04 | 0.02635857 |
| ENSMUSG00( | 464.21003  | -0.520477  | 0.15325169 | -3.4197424 | 6.27E-04 | 0.02670048 |
| ENSMUSG00( | 289.661165 | 0.77542494 | 0.23239003 | 3.41601244 | 6.35E-04 | 0.02696939 |
| ENSMUSG00( | 399.780805 | -0.5416145 | 0.15964066 | -3.4127651 | 6.43E-04 | 0.02716128 |
| ENSMUSG00( | 135.94801  | -0.6335299 | 0.17971072 | -3.4120848 | 6.45E-04 | 0.02716128 |
| ENSMUSG00( | 795.659336 | -0.3793213 | 0.11018582 | -3.4067467 | 6.57E-04 | 0.02749735 |
| ENSMUSG00( | 3271.37163 | -0.6280689 | 0.18237916 | -3.406913  | 6.57E-04 | 0.02749735 |
| ENSMUSG00( | 2234.15464 | -0.4709606 | 0.13711994 | -3.4051639 | 6.61E-04 | 0.02755739 |
| ENSMUSG00( | 57.4473892 | 0.83726371 | 0.24940244 | 3.39580651 | 6.84E-04 | 0.02811096 |
| ENSMUSG00( | 2575.39333 | -0.5229063 | 0.14979325 | -3.3983257 | 6.78E-04 | 0.02811096 |
| ENSMUSG00( | 485.140155 | 0.57884716 | 0.16844752 | 3.39646269 | 6.83E-04 | 0.02811096 |
| ENSMUSG00( | 601.408865 | -0.4662184 | 0.13637837 | -3.3959036 | 6.84E-04 | 0.02811096 |
| ENSMUSG00( | 67.5921502 | 0.81533756 | 0.25649602 | 3.39018592 | 6.98E-04 | 0.02859197 |
| ENSMUSG00( | 524.024963 | 0.42291327 | 0.1242158  | 3.37597278 | 7.36E-04 | 0.02987281 |
| ENSMUSG00( | 187.107163 | 0.52008745 | 0.15450436 | 3.37540147 | 7.37E-04 | 0.02987281 |
| ENSMUSG00( | 1131.06316 | -0.3400066 | 0.1010295  | -3.3752434 | 7.38E-04 | 0.02987281 |
| ENSMUSG00( | 414.187797 | -0.4838972 | 0.14338708 | -3.3717328 | 7.47E-04 | 0.03013074 |

|            |            |            |            |            |           |            |
|------------|------------|------------|------------|------------|-----------|------------|
| ENSMUSG00( | 400.174285 | -0.4818553 | 0.14331558 | -3.3700218 | 7.52E-04  | 0.03013074 |
| ENSMUSG00( | 399.082096 | -0.5511529 | 0.16179431 | -3.3699924 | 7.52E-04  | 0.03013074 |
| ENSMUSG00( | 612.556072 | -0.5556089 | 0.16281944 | -3.3682214 | 7.57E-04  | 0.03015706 |
| ENSMUSG00( | 254.551767 | -0.6049143 | 0.17929863 | -3.3668646 | 7.60E-04  | 0.03015706 |
| ENSMUSG00( | 2362.89688 | 0.40625787 | 0.11864806 | 3.36668992 | 7.61E-04  | 0.03015706 |
| ENSMUSG00( | 1933.77729 | -0.6068321 | 0.17945063 | -3.3659489 | 7.63E-04  | 0.03015706 |
| ENSMUSG00( | 482.045673 | -0.5591211 | 0.16355411 | -3.3626171 | 7.72E-04  | 0.03039983 |
| ENSMUSG00( | 266.393435 | 0.79131538 | 0.24300859 | 3.36185206 | 7.74E-04  | 0.03039983 |
| ENSMUSG00( | 3181.07768 | -0.5496271 | 0.16219188 | -3.3592357 | 7.82E-04  | 0.03058509 |
| ENSMUSG00( | 330.892255 | 0.61751714 | 0.17931898 | 3.35485562 | 7.94E-04  | 0.0309685  |
| ENSMUSG00( | 114.715974 | 0.69545597 | 0.20377871 | 3.35202955 | 8.02E-04  | 0.03097246 |
| ENSMUSG00( | 652.730974 | -0.4832513 | 0.14090391 | -3.3522153 | 8.02E-04  | 0.03097246 |
| ENSMUSG00( | 16615.4967 | -0.3857377 | 0.1130646  | -3.3523069 | 8.01E-04  | 0.03097246 |
| ENSMUSG00( | 794.02749  | 0.42714291 | 0.12676421 | 3.35049264 | 8.07E-04  | 0.03104103 |
| ENSMUSG00( | 353.476674 | -0.5915181 | 0.17110672 | -3.3482073 | 8.13E-04  | 0.03109087 |
| ENSMUSG00( | 1544.81606 | -0.4933366 | 0.14763426 | -3.3486721 | 8.12E-04  | 0.03109087 |
| ENSMUSG00( | 1271.48191 | -0.5947078 | 0.17295717 | -3.3461459 | 8.19E-04  | 0.03121958 |
| ENSMUSG00( | 201.388587 | 0.68474564 | 0.2056092  | 3.34499972 | 8.23E-04  | 0.03124576 |
| ENSMUSG00( | 303.40801  | -0.8505572 | 0.24945071 | -3.338896  | 8.41E-04  | 0.03173365 |
| ENSMUSG00( | 124.286789 | -0.8397663 | 0.24978854 | -3.3388788 | 8.41E-04  | 0.03173365 |
| ENSMUSG00( | 212.322702 | 0.61951174 | 0.18234316 | 3.33705187 | 8.47E-04  | 0.03178415 |
| ENSMUSG00( | 965.436938 | 0.52955043 | 0.15627519 | 3.33662665 | 8.48E-04  | 0.03178415 |
| ENSMUSG00( | 1164.7205  | -0.5650689 | 0.1685307  | -3.3302142 | 8.68E-04  | 0.03242003 |
| ENSMUSG00( | 81.1842874 | 0.85427041 | 0.25701112 | 3.32614464 | 8.81E-04  | 0.03267864 |
| ENSMUSG00( | 489.778563 | -0.5278678 | 0.16192698 | -3.3253088 | 8.83E-04  | 0.03267864 |
| ENSMUSG00( | 210.392695 | -0.7191367 | 0.21141336 | -3.3263517 | 8.80E-04  | 0.03267864 |
| ENSMUSG00( | 532.780125 | 0.72470077 | 0.21341122 | 3.32376543 | 8.88E-04  | 0.03275503 |
| ENSMUSG00( | 310.539097 | -0.6426083 | 0.19050981 | -3.3225219 | 8.92E-04  | 0.0327966  |
| ENSMUSG00( | 582.252733 | -0.4580711 | 0.13653273 | -3.3209068 | 8.97E-04  | 0.03288226 |
| ENSMUSG00( | 2267.68817 | -0.4649583 | 0.14109815 | -3.3183002 | 9.06E-04  | 0.03308565 |
| ENSMUSG00( | 108.835687 | -0.6156069 | 0.1814816  | -3.3151615 | 9.16E-04  | 0.03314474 |
| ENSMUSG00( | 95.9276354 | 0.64703767 | 0.19421558 | 3.31580384 | 9.14E-04  | 0.03314474 |
| ENSMUSG00( | 111.011375 | 0.66483824 | 0.21298577 | 3.31530609 | 9.15E-04  | 0.03314474 |
| ENSMUSG00( | 62215.4226 | -0.4850141 | 0.14307391 | -3.3142317 | 9.19E-04  | 0.03315124 |
| ENSMUSG00( | 528.684429 | -0.5432435 | 0.16102843 | -3.3075762 | 9.41E-04  | 0.03373827 |
| ENSMUSG00( | 830.137158 | 0.5838189  | 0.17456337 | 3.30796993 | 9.40E-04  | 0.03373827 |
| ENSMUSG00( | 186.796694 | -0.5500102 | 0.16556025 | -3.3052834 | 9.49E-04  | 0.03380554 |
| ENSMUSG00( | 308.203504 | 0.65717327 | 0.21153233 | 3.30554072 | 9.48E-04  | 0.03380554 |
| ENSMUSG00( | 485.45032  | 0.44685277 | 0.13457903 | 3.30078153 | 9.64E-04  | 0.03424694 |
| ENSMUSG00( | 72.1317354 | -0.7327241 | 0.21584896 | -3.295163  | 9.84E-04  | 0.03483194 |
| ENSMUSG00( | 282.511228 | -0.5720038 | 0.17092405 | -3.2903584 | 0.0010006 | 0.03515046 |



|            |            |            |            |            |            |            |
|------------|------------|------------|------------|------------|------------|------------|
| ENSMUSG00( | 869.473616 | -0.4099663 | 0.12432437 | -3.2917084 | 9.96E-04   | 0.03515046 |
| ENSMUSG00( | 5185.01225 | -0.6502113 | 0.19395616 | -3.2900275 | 0.00100178 | 0.03515046 |
| ENSMUSG00( | 384.197634 | 0.54159401 | 0.16235768 | 3.28814924 | 0.00100848 | 0.03527859 |
| ENSMUSG00( | 735.110905 | 0.51126333 | 0.15601642 | 3.28674062 | 0.00101354 | 0.03534841 |
| ENSMUSG00( | 532.137633 | -0.4557451 | 0.13597029 | -3.2852307 | 0.00101899 | 0.03543136 |
| ENSMUSG00( | 41.7083244 | 0.60689565 | 0.25065513 | 3.28303641 | 0.00102695 | 0.03560107 |
| ENSMUSG00( | 296.410775 | 0.54372602 | 0.16699337 | 3.28013424 | 0.00103758 | 0.03586164 |
| ENSMUSG00( | 2807.40057 | -0.556959  | 0.16355708 | -3.2754837 | 0.00105481 | 0.03630566 |
| ENSMUSG00( | 442.791891 | 0.50860968 | 0.15481939 | 3.27497489 | 0.00105671 | 0.03630566 |
| ENSMUSG00( | 63.2497601 | 0.77380051 | 0.24132254 | 3.27363872 | 0.00106172 | 0.03636951 |
| ENSMUSG00( | 463.943514 | -0.8364066 | 0.25551289 | -3.2670415 | 0.00108678 | 0.03700814 |
| ENSMUSG00( | 1004.53567 | -0.4965685 | 0.14978826 | -3.2678273 | 0.00108376 | 0.03700814 |
| ENSMUSG00( | 66.8171799 | -0.7302946 | 0.21911749 | -3.2625777 | 0.00110404 | 0.03748538 |
| ENSMUSG00( | 845.793696 | 0.58804007 | 0.1791343  | 3.25503472 | 0.00113379 | 0.03754948 |
| ENSMUSG00( | 197.401928 | 0.61499003 | 0.18838474 | 3.25640539 | 0.00112833 | 0.03754948 |
| ENSMUSG00( | 412.302739 | -0.5715776 | 0.17533325 | -3.26092   | 0.00111051 | 0.03754948 |
| ENSMUSG00( | 931.774664 | -0.6520111 | 0.19790107 | -3.2554525 | 0.00113212 | 0.03754948 |
| ENSMUSG00( | 223.823358 | -0.5976527 | 0.18128523 | -3.2589639 | 0.0011182  | 0.03754948 |
| ENSMUSG00( | 172.337772 | -0.4947301 | 0.15225571 | -3.2546801 | 0.0011352  | 0.03754948 |
| ENSMUSG00( | 2382.85827 | -0.7921073 | 0.23702264 | -3.2590442 | 0.00111788 | 0.03754948 |
| ENSMUSG00( | 1212.08301 | 0.48051182 | 0.14623237 | 3.2549144  | 0.00113427 | 0.03754948 |
| ENSMUSG00( | 289.666788 | -0.6397448 | 0.18956457 | -3.2577526 | 0.00112298 | 0.03754948 |
| ENSMUSG00( | 45.1451836 | -0.7569019 | 0.23120475 | -3.2535736 | 0.00113963 | 0.03758832 |
| ENSMUSG00( | 706.132641 | -0.5532214 | 0.16706603 | -3.2496905 | 0.00115531 | 0.03799675 |
| ENSMUSG00( | 7745.03001 | -0.6965421 | 0.20709819 | -3.2486132 | 0.00115969 | 0.03803257 |
| ENSMUSG00( | 296.986333 | 0.71097749 | 0.21106879 | 3.24734011 | 0.00116489 | 0.03803385 |
| ENSMUSG00( | 249.546436 | 0.5994224  | 0.18283487 | 3.24620588 | 0.00116954 | 0.03803385 |
| ENSMUSG00( | 5740.52183 | -0.3745239 | 0.11664192 | -3.2461886 | 0.00116961 | 0.03803385 |
| ENSMUSG00( | 679.672584 | 0.50472657 | 0.15432814 | 3.23972759 | 0.00119644 | 0.03869672 |
| ENSMUSG00( | 54.0717527 | 0.73467197 | 0.22671971 | 3.239665   | 0.0011967  | 0.03869672 |
| ENSMUSG00( | 1124.04857 | 0.41094738 | 0.12632609 | 3.23777994 | 0.00120464 | 0.03883485 |
| ENSMUSG00( | 289.911132 | -0.8440758 | 0.25438238 | -3.2370548 | 0.0012077  | 0.03883485 |
| ENSMUSG00( | 60.4776953 | 0.71182644 | 0.21810088 | 3.229212   | 0.00124132 | 0.03958503 |
| ENSMUSG00( | 516.931458 | -0.5909626 | 0.18344367 | -3.2297168 | 0.00123913 | 0.03958503 |
| ENSMUSG00( | 168.201862 | 0.69314185 | 0.21648172 | 3.23000036 | 0.0012379  | 0.03958503 |
| ENSMUSG00( | 3205.6328  | -0.5889436 | 0.18050216 | -3.2255844 | 0.00125716 | 0.03958875 |
| ENSMUSG00( | 1095.79202 | -0.6035893 | 0.18416826 | -3.2258494 | 0.00125599 | 0.03958875 |
| ENSMUSG00( | 1297.34843 | -0.4803727 | 0.14832237 | -3.2229289 | 0.00126887 | 0.03958875 |
| ENSMUSG00( | 889.499515 | -0.5381212 | 0.16014107 | -3.2230802 | 0.0012682  | 0.03958875 |
| ENSMUSG00( | 196.103521 | -0.6070321 | 0.1886919  | -3.2276888 | 0.00124795 | 0.03958875 |
| ENSMUSG00( | 2292.80954 | -0.429567  | 0.13350959 | -3.2249767 | 0.00125983 | 0.03958875 |

|            |            |            |            |            |            |            |
|------------|------------|------------|------------|------------|------------|------------|
| ENSMUSG00( | 288.313874 | -0.5122739 | 0.15846202 | -3.2272118 | 0.00125003 | 0.03958875 |
| ENSMUSG00( | 53.8041755 | -0.8132791 | 0.24387043 | -3.2235408 | 0.00126616 | 0.03958875 |
| ENSMUSG00( | 237.087932 | 0.54176096 | 0.16791975 | 3.22067333 | 0.0012789  | 0.03979408 |
| ENSMUSG00( | 1997.64299 | -0.3885848 | 0.11998795 | -3.2168032 | 0.00129627 | 0.03984993 |
| ENSMUSG00( | 2233.22771 | -0.427668  | 0.13260684 | -3.2164319 | 0.00129795 | 0.03984993 |
| ENSMUSG00( | 198.338441 | -0.6547768 | 0.20093415 | -3.2177796 | 0.00129187 | 0.03984993 |
| ENSMUSG00( | 907.285152 | -0.5211862 | 0.16032832 | -3.2186996 | 0.00128773 | 0.03984993 |
| ENSMUSG00( | 1195.14764 | -0.4969949 | 0.15625631 | -3.2190708 | 0.00128607 | 0.03984993 |
| ENSMUSG00( | 333.232599 | 0.67186289 | 0.20835225 | 3.21372164 | 0.00131027 | 0.04012126 |
| ENSMUSG00( | 708.569997 | -0.5162356 | 0.15983791 | -3.2076362 | 0.00133831 | 0.04087146 |
| ENSMUSG00( | 1762.21433 | -0.6079348 | 0.18236819 | -3.2029677 | 0.00136019 | 0.04113843 |
| ENSMUSG00( | 312.886567 | 0.51237229 | 0.16111959 | 3.20197962 | 0.00136487 | 0.04113843 |
| ENSMUSG00( | 847.243041 | 0.66225083 | 0.19924746 | 3.20265659 | 0.00136166 | 0.04113843 |
| ENSMUSG00( | 591.493985 | 0.52431163 | 0.1604747  | 3.20391124 | 0.00135574 | 0.04113843 |
| ENSMUSG00( | 61.0064198 | 0.69796878 | 0.22171737 | 3.20400603 | 0.0013553  | 0.04113843 |
| ENSMUSG00( | 9418.07257 | -0.3357643 | 0.10354385 | -3.1992279 | 0.00137796 | 0.04139363 |
| ENSMUSG00( | 1200.31999 | -0.4280355 | 0.13271241 | -3.1986964 | 0.0013805  | 0.04139363 |
| ENSMUSG00( | 114.780464 | 0.76387123 | 0.25831187 | 3.19693113 | 0.00138898 | 0.04153988 |
| ENSMUSG00( | 273.050779 | 0.70343831 | 0.22058041 | 3.19052152 | 0.00142016 | 0.04236268 |
| ENSMUSG00( | 1156.5316  | -0.5868903 | 0.18242214 | -3.1859192 | 0.00144295 | 0.04293145 |
| ENSMUSG00( | 398.678466 | -0.5215172 | 0.16018537 | -3.1798257 | 0.00147364 | 0.04330497 |
| ENSMUSG00( | 232.330829 | -0.6355541 | 0.19840004 | -3.1825752 | 0.00145972 | 0.04330497 |
| ENSMUSG00( | 1231.05342 | -0.4882051 | 0.15117529 | -3.1799864 | 0.00147282 | 0.04330497 |
| ENSMUSG00( | 522.307988 | -0.5475128 | 0.17154429 | -3.1808995 | 0.00146819 | 0.04330497 |
| ENSMUSG00( | 100.476221 | -0.6717348 | 0.20641411 | -3.1797032 | 0.00147426 | 0.04330497 |
| ENSMUSG00( | 326.361874 | 0.57310695 | 0.18097993 | 3.17805855 | 0.00148265 | 0.04344084 |
| ENSMUSG00( | 293.014607 | -0.5614929 | 0.17901148 | -3.1758166 | 0.00149415 | 0.04366712 |
| ENSMUSG00( | 79.8471025 | -0.7172534 | 0.25554617 | -3.1678842 | 0.00153553 | 0.04476293 |
| ENSMUSG00( | 280.309403 | -0.5721568 | 0.178152   | -3.1645461 | 0.00155325 | 0.04513584 |
| ENSMUSG00( | 47.8712368 | 0.79251253 | 0.24754846 | 3.16327504 | 0.00156005 | 0.04513584 |
| ENSMUSG00( | 54.3644244 | 0.7882677  | 0.24563423 | 3.1637523  | 0.00155749 | 0.04513584 |
| ENSMUSG00( | 1257.98592 | 0.33573808 | 0.10527231 | 3.1625261  | 0.00156407 | 0.04513898 |
| ENSMUSG00( | 2813.65318 | -0.468481  | 0.1462436  | -3.1608384 | 0.00157316 | 0.04517545 |
| ENSMUSG00( | 439.678568 | -0.4836645 | 0.1523203  | -3.1614874 | 0.00156966 | 0.04517545 |
| ENSMUSG00( | 327.013788 | -0.6286845 | 0.19617959 | -3.1560789 | 0.00159906 | 0.04580521 |
| ENSMUSG00( | 6386.07457 | 0.73899253 | 0.224726   | 3.15477427 | 0.00160622 | 0.04589664 |
| ENSMUSG00( | 1606.79789 | -0.4227568 | 0.13324757 | -3.1539339 | 0.00161086 | 0.04591536 |
| ENSMUSG00( | 1626.64498 | -0.3607462 | 0.11456136 | -3.1478903 | 0.00164453 | 0.04675986 |
| ENSMUSG00( | 410.066883 | -0.5695745 | 0.17938778 | -3.1441119 | 0.00166592 | 0.04707359 |
| ENSMUSG00( | 149.625165 | -0.7078218 | 0.21591083 | -3.1439058 | 0.00166709 | 0.04707359 |
| ENSMUSG00( | 932.145051 | 0.59123464 | 0.18334522 | 3.14378112 | 0.0016678  | 0.04707359 |

|            |            |            |            |            |            |            |
|------------|------------|------------|------------|------------|------------|------------|
| ENSMUSG00( | 97.5511625 | -0.7148759 | 0.2170929  | -3.1403141 | 0.00168767 | 0.04728746 |
| ENSMUSG00( | 1063.78048 | -0.3943603 | 0.12617808 | -3.1404297 | 0.001687   | 0.04728746 |
| ENSMUSG00( | 139.78667  | -0.6836502 | 0.21265734 | -3.1404093 | 0.00168712 | 0.04728746 |
| ENSMUSG00( | 260.984686 | -0.6015216 | 0.1880224  | -3.1388003 | 0.00169641 | 0.04741734 |
| ENSMUSG00( | 12174.7274 | -0.4970932 | 0.15922563 | -3.1375408 | 0.00170372 | 0.04750651 |
| ENSMUSG00( | 316.529561 | -0.6061981 | 0.19066875 | -3.1355842 | 0.00171512 | 0.04753964 |
| ENSMUSG00( | 186.231483 | -0.6477634 | 0.20390822 | -3.134981  | 0.00171865 | 0.04753964 |
| ENSMUSG00( | 49.4114939 | 0.78124687 | 0.24782409 | 3.13451637 | 0.00172138 | 0.04753964 |
| ENSMUSG00( | 55.1559842 | -0.6783127 | 0.21360284 | -3.1354529 | 0.00171589 | 0.04753964 |
| ENSMUSG00( | 381.888246 | -0.5622759 | 0.18213519 | -3.1309866 | 0.0017422  | 0.0477719  |
| ENSMUSG00( | 758.021715 | -0.3790156 | 0.12180801 | -3.1312519 | 0.00174063 | 0.0477719  |
| ENSMUSG00( | 3083.9897  | -0.5253939 | 0.1632848  | -3.131347  | 0.00174006 | 0.0477719  |
| ENSMUSG00( | 787.374999 | 0.65473489 | 0.2151689  | 3.12901912 | 0.00175391 | 0.04797897 |
| ENSMUSG00( | 175.481165 | 0.58065344 | 0.1845483  | 3.12791383 | 0.00176052 | 0.04804591 |
| ENSMUSG00( | 98.2032339 | 0.73304606 | 0.22919323 | 3.1244122  | 0.00178161 | 0.04850677 |
| ENSMUSG00( | 183.052664 | -0.6549986 | 0.19821795 | -3.1236642 | 0.00178614 | 0.04851581 |
| ENSMUSG00( | 1073.11931 | -0.4945748 | 0.15356662 | -3.1208922 | 0.00180304 | 0.04885984 |
| ENSMUSG00( | 2944.75232 | -0.580011  | 0.18522735 | -3.1198821 | 0.00180923 | 0.04891289 |
| ENSMUSG00( | 233.765367 | -0.4700775 | 0.14756546 | -3.1162447 | 0.0018317  | 0.04917303 |
| ENSMUSG00( | 301.978177 | -0.4673693 | 0.14675537 | -3.1146713 | 0.0018415  | 0.04917303 |
| ENSMUSG00( | 173.803042 | -0.6817796 | 0.21605635 | -3.113709  | 0.00184752 | 0.04917303 |
| ENSMUSG00( | 2184.89285 | -0.567963  | 0.18423317 | -3.1172047 | 0.00182575 | 0.04917303 |
| ENSMUSG00( | 949.955831 | -0.430334  | 0.140083   | -3.1144064 | 0.00184315 | 0.04917303 |
| ENSMUSG00( | 466.684287 | -0.5089199 | 0.15963964 | -3.1162944 | 0.00183139 | 0.04917303 |
| ENSMUSG00( | 195.15415  | -0.5006231 | 0.1619033  | -3.1135241 | 0.00184867 | 0.04917303 |
| ENSMUSG00( | 557.033994 | -0.5200826 | 0.16536076 | -3.1122929 | 0.0018564  | 0.04926507 |
| ENSMUSG00( | 642.701954 | -0.571452  | 0.18190206 | -3.1104927 | 0.00186776 | 0.04933951 |
| ENSMUSG00( | 1533.53364 | -0.4627444 | 0.14755583 | -3.1106973 | 0.00186646 | 0.04933951 |
| ENSMUSG00( | 364.117525 | -0.4409783 | 0.14069612 | -3.1080707 | 0.00188313 | 0.04963209 |
| ENSMUSG00( | 1802.74605 | -0.6056056 | 0.19110686 | -3.1059103 | 0.00189694 | 0.04974022 |
| ENSMUSG00( | 852.068925 | -0.585335  | 0.18669425 | -3.1042832 | 0.00190741 | 0.04974022 |
| ENSMUSG00( | 324.881608 | 0.57486866 | 0.19080543 | 3.10473807 | 0.00190448 | 0.04974022 |
| ENSMUSG00( | 827.573244 | 0.51257389 | 0.16665051 | 3.10503271 | 0.00190258 | 0.04974022 |
| ENSMUSG00( | 630.942153 | -0.3749955 | 0.121043   | -3.1040708 | 0.00190878 | 0.04974022 |

| symbol   | description    | biotype        | broadClass | geneSeqStart | geneSeqEnd | seqName |    |
|----------|----------------|----------------|------------|--------------|------------|---------|----|
| Egr1     | early growth   | protein_coding | coding     | 34859823     | 34864984   |         | 18 |
| Fos      | FBJ osteosarc  | protein_coding | coding     | 85473890     | 85477273   |         | 12 |
| Gm26825  | predicted ger  | lincRNA        | noncoding  | 5781530      | 5783636    |         | 5  |
| Chordc1  | cysteine and   | protein_coding | coding     | 18292125     | 18317442   |         | 9  |
| Npr3     | natriuretic pe | protein_coding | coding     | 11839896     | 11905674   |         | 15 |
| Zbtb16   | zinc finger an | protein_coding | coding     | 48654297     | 48836222   |         | 9  |
| Hlf      | hepatic leuke  | protein_coding | coding     | 90336536     | 90390895   |         | 11 |
| Csf3r    | colony stimul  | protein_coding | coding     | 126024550    | 126044440  |         | 4  |
| Srsf5    | serine/argini  | protein_coding | coding     | 80945504     | 80950507   |         | 12 |
| Hspa8    | heat shock pr  | protein_coding | coding     | 40800984     | 40810087   |         | 9  |
| Nr4a1    | nuclear receç  | protein_coding | coding     | 101266846    | 101274792  |         | 15 |
| Stip1    | stress-induce  | protein_coding | coding     | 7020696      | 7040026    |         | 19 |
| S100a8   | S100 calcium   | protein_coding | coding     | 90668978     | 90670035   |         | 3  |
| Ahsa2    | AHA1, activat  | protein_coding | coding     | 23487882     | 23498030   |         | 11 |
| Hspb1    | heat shock pr  | protein_coding | coding     | 135887919    | 135889563  |         | 5  |
| Hsp90aa1 | heat shock pr  | protein_coding | coding     | 110690605    | 110702728  |         | 12 |
| Npc1     | Niemann-Picl   | protein_coding | coding     | 12189693     | 12236400   |         | 18 |
| Fkbp5    | FK506 bindin   | protein_coding | coding     | 28399095     | 28517524   |         | 17 |
| Dynll1   | dynein light c | protein_coding | coding     | 115297110    | 115300999  |         | 5  |
| Erh      | enhancer of r  | protein_coding | coding     | 80634022     | 80644341   |         | 12 |
| Dnaja1   | DnaJ heat shç  | protein_coding | coding     | 40722150     | 40737149   |         | 4  |
| Pcnx3    | pecanex hom    | protein_coding | coding     | 5664635      | 5688908    |         | 19 |
| Cacybp   | calcyclin bind | protein_coding | coding     | 160202367    | 160212875  |         | 1  |
| Dnajb1   | DnaJ heat shç  | protein_coding | coding     | 83608193     | 83612653   |         | 8  |
| Il1b     | interleukin 1  | protein_coding | coding     | 129364570    | 129371139  |         | 2  |
| Herc3    | hect domain    | protein_coding | coding     | 58831465     | 58920398   |         | 6  |
| Smad6    | SMAD family    | protein_coding | coding     | 63953076     | 64022059   |         | 9  |
| Fancc    | Fanconi anen   | protein_coding | coding     | 63285043     | 63497278   |         | 13 |
| Ahsa1    | AHA1, activat  | protein_coding | coding     | 87266479     | 87273998   |         | 12 |
| P4ha1    | procollagen-ç  | protein_coding | coding     | 59323296     | 59373304   |         | 10 |
| AY036118 | cDNA sequen    | lincRNA        | noncoding  | 39847113     | 39848035   |         | 17 |
| Sh3pxd2a | SH3 and PX d   | protein_coding | coding     | 47260174     | 47464411   |         | 19 |
| Rpl11    | ribosomal prç  | protein_coding | coding     | 136028265    | 136053428  |         | 4  |
| Lrrc32   | leucine rich r | protein_coding | coding     | 98489283     | 98502181   |         | 7  |
| Arap1    | ArfGAP with l  | protein_coding | coding     | 101348067    | 101412586  |         | 7  |
| Cry1     | cryptochromç   | protein_coding | coding     | 85131700     | 85185064   |         | 10 |
| Skp1a    | S-phase kinas  | protein_coding | coding     | 52231995     | 52246858   |         | 11 |
| Xpc      | xeroderma pi   | protein_coding | coding     | 91489305     | 91515888   |         | 6  |
| Ccbe1    | collagen and   | protein_coding | coding     | 66045302     | 66302739   |         | 18 |
| Shisa6   | shisa family n | protein_coding | coding     | 66211725     | 66525964   |         | 11 |

|          |                |              |        |           |            |    |
|----------|----------------|--------------|--------|-----------|------------|----|
| Fcho1    | FCH domain c   | protein_codi | coding | 71708387  | 71725716   | 8  |
| Rps3     | ribosomal pr   | protein_codi | coding | 99477896  | 99483738   | 7  |
| Lyve1    | lymphatic ve   | protein_codi | coding | 110850607 | 110863239  | 7  |
| Jcad     | junctional ca  | protein_codi | coding | 4634929   | 4682868    | 18 |
| Gpihbp1  | GPI-anchorec   | protein_codi | coding | 75596628  | 75599481   | 15 |
| Ston1    | stonin 1 [Sou  | protein_codi | coding | 88597684  | 88662586   | 17 |
| Rfx5     | regulatory fa  | protein_codi | coding | 94954075  | 94961561   | 3  |
| Rpl31    | ribosomal pr   | protein_codi | coding | 39367842  | 39371911   | 1  |
| Manf     | mesencephal    | protein_codi | coding | 106838312 | 106891979  | 9  |
| Caskin2  | CASK-interact  | protein_codi | coding | 115799183 | 115813639  | 11 |
| Rpl21    | ribosomal pr   | protein_codi | coding | 146832890 | 146837032  | 5  |
| Rasal3   | RAS protein a  | protein_codi | coding | 32390659  | 32403583   | 17 |
| Rpl36    | ribosomal pr   | protein_codi | coding | 56613395  | 56614243   | 17 |
| Rapgef5  | Rap guanine i  | protein_codi | coding | 117516479 | 117759737  | 12 |
| Rpl13    | ribosomal pr   | protein_codi | coding | 123102350 | 123105244  | 8  |
| Epb41l2  | erythrocyte n  | protein_codi | coding | 25359798  | 25523519   | 10 |
| Flt1     | FMS-like tyro  | protein_codi | coding | 147561604 | 147726011  | 5  |
| Hsp90ab1 | heat shock pr  | protein_codi | coding | 45567775  | 45573271   | 17 |
| Hspa5    | heat shock pr  | protein_codi | coding | 34771970  | 34777547   | 2  |
| Dbnnd2   | dysbindin (dy  | protein_codi | coding | 164486106 | 164493319  | 2  |
| Ap2m1    | adaptor-relat  | protein_codi | coding | 20535478  | 20544909   | 16 |
| Carhsp1  | calcium regul  | protein_codi | coding | 8658587   | 8672153    | 16 |
| Mtmr4    | myotubularin   | protein_codi | coding | 87592162  | 87616302   | 11 |
| Cd180    | CD180 antige   | protein_codi | coding | 102693558 | 102739629  | 13 |
| Hyal2    | hyaluronoglu   | protein_codi | coding | 107567945 | 107572779  | 9  |
| Rfc5     | replication fa | protein_codi | coding | 117378103 | 117389047  | 5  |
| Bsd1     | BSD domain c   | protein_codi | coding | 129461581 | 129488498  | 4  |
| Hecw2    | HECT, C2 and   | protein_codi | coding | 53806876  | 54195168   | 1  |
| Gabpb1   | GA repeat bir  | protein_codi | coding | 126627442 | 126676337  | 2  |
| Paxbp1   | PAX3 and PA)   | protein_codi | coding | 91014037  | 91044543   | 16 |
| Hsph1    | heat shock 1(  | protein_codi | coding | 149614287 | 149636376  | 5  |
| Tvp23b   | trans-golgi n  | protein_codi | coding | 62879455  | 62916780   | 11 |
| Hlx      | H2.0-like hon  | protein_codi | coding | 184727140 | 184732619  | 1  |
| Rpl35a   | ribosomal pr   | protein_codi | coding | 33056453  | 33060189   | 16 |
| Hspe1    | heat shock pr  | protein_codi | coding | 55088132  | 55091307   | 1  |
| Srrm2    | serine/argini  | protein_codi | coding | 23790662  | 23824741   | 17 |
| Rab22a   | RAB22A, mer    | protein_codi | coding | 173659760 | 173707343  | 2  |
| Cyr61    | cysteine rich  | protein_codi | coding | 145646976 | 145649981  | 3  |
| Klhl15   | kelch-like 15  | protein_codi | coding | 94234599  | 94277724 X |    |
| Dok4     | docking prote  | protein_codi | coding | 94863828  | 94876330   | 8  |
| Jdp2     | Jun dimerizat  | protein_codi | coding | 85599027  | 85639878   | 12 |

|             |                              |                |           |           |    |
|-------------|------------------------------|----------------|-----------|-----------|----|
| Pias4       | protein inhibitor of         | protein_coding | 81153266  | 81167923  | 10 |
| Rps27rt     | ribosomal protein            | protein_coding | 114982366 | 114982739 | 9  |
| Ppp4r4      | protein phosphatase          | protein_coding | 103532283 | 103613831 | 12 |
| Mgat4a      | mannosidase alpha            | protein_coding | 37439340  | 37541016  | 1  |
| Plat        | plasminogen activator        | protein_coding | 22757727  | 22782844  | 8  |
| Irx2        | Iroquois related             | protein_coding | 72628820  | 72634198  | 13 |
| Zmym3       | zinc finger, MYB             | protein_coding | 101404384 | 101420849 | X  |
| Rps15a      | ribosomal protein            | protein_coding | 118104372 | 118116188 | 7  |
| Rps25       | ribosomal protein            | protein_coding | 44407139  | 44410427  | 9  |
| Trip10      | thyroid hormone              | protein_coding | 57249455  | 57263665  | 17 |
| Lrmp        | lymphoid-restricted          | protein_coding | 145115653 | 145174934 | 6  |
| Rps12-ps3   | ribosomal protein            | protein_coding | 59322290  | 59322783  | 19 |
| Zfp579      | zinc finger protein          | protein_coding | 4983483   | 4996158   | 7  |
| Rtkn        | rhotekin [Sorcin             | protein_coding | 83135463  | 83152579  | 6  |
| Rabep2      | rabaptin, RAE1               | protein_coding | 126428759 | 126449245 | 7  |
| Mras        | muscle and nerve             | protein_coding | 99385420  | 99437381  | 9  |
| Ccser2      | coiled-coil serine           | protein_coding | 36874936  | 36968777  | 14 |
| Slc9a3r2    | solute carrier protein       | protein_coding | 24639282  | 24650305  | 17 |
| Cyb5r3      | cytochrome b5                | protein_coding | 83153494  | 83172592  | 15 |
| St13        | suppression of               | protein_coding | 81363669  | 81400077  | 15 |
| Fam96b      | family with sequence         | protein_coding | 104639838 | 104641965 | 8  |
| Slc45a4     | solute carrier protein       | protein_coding | 73577424  | 73645762  | 15 |
| Rbm12       | RNA binding motif            | protein_coding | 156091958 | 156111978 | 2  |
| Zfp970      | zinc finger protein          | protein_coding | 177464733 | 177478129 | 2  |
| S100a10     | S100 calcium binding         | protein_coding | 93555080  | 93564643  | 3  |
| Pnkp        | polynucleotide kinase        | protein_coding | 44857139  | 44862992  | 7  |
| Cct3        | chaperonin class 1           | protein_coding | 88297116  | 88321767  | 3  |
| Dusp3       | dual specificity phosphatase | protein_coding | 101971143 | 101987013 | 11 |
| Aimp1       | aminoacyl tRNA synthetase    | protein_coding | 132660499 | 132684370 | 3  |
| Ddit3       | DNA-damage inducible         | protein_coding | 127290774 | 127296288 | 10 |
| Hspd1       | heat shock protein           | protein_coding | 55077835  | 55088243  | 1  |
| Camsap1     | calmodulin regulatory        | protein_coding | 25926838  | 25983282  | 2  |
| Ndufa4      | NADH dehydrogenase           | protein_coding | 11900292  | 11907497  | 6  |
| Zfp940      | zinc finger protein          | protein_coding | 29833620  | 29853669  | 7  |
| Lyz1        | lysozyme 1 [Swine            | protein_coding | 117287797 | 117292868 | 10 |
| Huwe1       | HECT, UBA array              | protein_coding | 151800807 | 151935417 | X  |
| Map7d1      | MAP7 domain containing       | protein_coding | 126232167 | 126256343 | 4  |
| Il17rc      | interleukin 17               | protein_coding | 113471427 | 113483140 | 6  |
| Osbp17      | oxysterol binding            | protein_coding | 97050628  | 97068904  | 11 |
| 4930486L24F | RIKEN cDNA 4930486L24F       | protein_coding | 60842612  | 60864475  | 13 |
| Rpl26       | ribosomal protein            | protein_coding | 68901583  | 68906989  | 11 |

|             |                |                     |           |             |    |
|-------------|----------------|---------------------|-----------|-------------|----|
| Eif1ax      | eukaryotic tra | protein_coding      | 159372178 | 159389928 X |    |
| Gm10260     | predicted ger  | protein_coding      | 97760072  | 97760632    | 13 |
| Smg7        | Smg-7 homol    | protein_coding      | 152836995 | 152902646   | 1  |
| Zfp365      | zinc finger pr | protein_coding      | 67886103  | 67912662    | 10 |
| Ubqln4      | ubiquilin 4 [S | protein_coding      | 88553758  | 88569725    | 3  |
| Ptges3      | prostaglandin  | protein_coding      | 128058954 | 128077272   | 10 |
| Rab8a       | RAB8A, mem     | protein_coding      | 72161200  | 72183904    | 8  |
| Ubl4a       | ubiquitin-like | protein_coding      | 74365718  | 74373218 X  |    |
| Arl4d       | ADP-ribosylat  | protein_coding      | 101665541 | 101667832   | 11 |
| Rpl35       | ribosomal pr   | protein_coding      | 39001580  | 39005624    | 2  |
| Dhx34       | DEAH (Asp-Gl   | protein_coding      | 16197147  | 16222037    | 7  |
| Slc2a6      | solute carrier | protein_coding      | 27021363  | 27027998    | 2  |
| Tpcn2       | two pore seg   | protein_coding      | 145186524 | 145284011   | 7  |
| Tox4        | TOX high mol   | protein_coding      | 52279146  | 52296391    | 14 |
| Rpl22l1     | ribosomal pr   | protein_coding      | 28805436  | 28807424    | 3  |
| Mbd1        | methyl-CpG k   | protein_coding      | 74267605  | 74282732    | 18 |
| Hdac6       | histone deac   | protein_coding      | 7930120   | 7947889 X   |    |
| Loxl1       | lysyl oxidase- | protein_coding      | 58287738  | 58313186    | 9  |
| Akap17b     | A kinase (PRK  | protein_coding      | 36608314  | 36645395 X  |    |
| Meg3        | maternally ex  | lincRNA noncoding   | 109541001 | 109571726   | 12 |
| Shroom3     | shroom famil   | protein_coding      | 92683435  | 92965318    | 5  |
| Zfp366      | zinc finger pr | protein_coding      | 99184823  | 99250656    | 13 |
| Ncbp1       | nuclear cap b  | protein_coding      | 46138613  | 46172403    | 4  |
| Ndor1       | NADPH depe     | protein_coding      | 25244821  | 25256022    | 2  |
| Map4k1      | mitogen-acti   | protein_coding      | 28982050  | 29003279    | 7  |
| Ncoa6       | nuclear rece   | protein_coding      | 155390656 | 155473894   | 2  |
| Atad3a      | ATPase famil   | protein_coding      | 155740641 | 155761093   | 4  |
| Fam107a     | family with s  | protein_coding      | 8296274   | 8318023     | 14 |
| Hras        | Harvey rat sa  | protein_coding      | 141189105 | 141194005   | 7  |
| Rpl14       | ribosomal pr   | protein_coding      | 120571444 | 120574654   | 9  |
| Tmem57      | transmembr     | protein_coding      | 134802759 | 134853345   | 4  |
| Kdm4a       | lysine (K)-spe | protein_coding      | 118136957 | 118180043   | 4  |
| Nr4a2       | nuclear rece   | protein_coding      | 57106830  | 57124003    | 2  |
| Tnrc18      | trinucleotide  | protein_coding      | 142724661 | 142817662   | 5  |
| Rasgrp4     | RAS guanyl r   | protein_coding      | 29134851  | 29153961    | 7  |
| 2310035C23F | RIKEN cDNA i   | protein_coding      | 105663861 | 105755191   | 1  |
| mt-Nd4      | mitochondria   | protein_coding mito | 10167     | 11544 MT    |    |
| Nfe2l2      | nuclear facto  | protein_coding      | 75675513  | 75704641    | 2  |
| Tap1        | transporter 1  | protein_coding      | 34187553  | 34197225    | 17 |
| Gm2000      | predicted ger  | protein_coding      | 156366040 | 156366484   | 1  |
| Tusc5       | tumor suppre   | protein_coding      | 76679808  | 76698664    | 11 |

|            |                                               |           |             |    |
|------------|-----------------------------------------------|-----------|-------------|----|
| Srd5a3     | steroid 5 alph protein_coding                 | 76140271  | 76155504    | 5  |
| Col15a1    | collagen, type protein_coding                 | 47208161  | 47313167    | 4  |
| Cbfa2t3    | core-binding protein_coding                   | 122625141 | 122699109   | 8  |
| Hsd11b1    | hydroxysteroid protein_coding                 | 193221634 | 193264075   | 1  |
| Zcchc2     | zinc finger, C protein_coding                 | 105990406 | 106034074   | 1  |
| Rpl37      | ribosomal protein_coding                      | 5116613   | 5119140     | 15 |
| Dnaja4     | DnaJ heat shock protein_coding                | 54698873  | 54716315    | 9  |
| Ier2       | immediate early protein_coding                | 84661331  | 84662852    | 8  |
| Cc2d1b     | coiled-coil anchor protein_coding             | 108619940 | 108634123   | 4  |
| Trmt13     | tRNA methyltransferase protein_coding         | 116581093 | 116614587   | 3  |
| Tma7       | translational protein_coding                  | 109074568 | 109082587   | 9  |
| Mrpl42     | mitochondrial protein_coding                  | 95480805  | 95501940    | 10 |
| Gtf2a1     | general transcription factor protein_coding   | 91555262  | 91590487    | 12 |
| Dynl1t3    | dynein light chain protein_coding             | 9654267   | 9663003 X   |    |
| Pdlim5     | PDZ and LIM domain protein_coding             | 142239590 | 142395696   | 3  |
| Arhgap4    | Rho GTPase activator protein_coding           | 73891442  | 73921870 X  |    |
| 1810011O10 | RIKEN cDNA 1810011O10 protein_coding          | 24437180  | 24438984    | 8  |
| Fas        | Fas (TNF receptor) protein_coding             | 34290659  | 34327770    | 19 |
| S100g      | S100 calcium binding protein_coding           | 162961992 | 162964599 X |    |
| Maff       | v-maf myb oncogene protein_coding             | 79347541  | 79359072    | 15 |
| Cd200      | CD200 antigen protein_coding                  | 45382135  | 45409053    | 16 |
| Usp20      | ubiquitin specific protease protein_coding    | 30982279  | 31023586    | 2  |
| Tprgl      | transforming protein_coding                   | 154157485 | 154160666   | 4  |
| Ripor2     | RHO family interacting protein_coding         | 24582189  | 24733816    | 13 |
| Rnf13      | ring finger protein_coding                    | 57736062  | 57835233    | 3  |
| Neur13     | neuralized E3 ubiquitin ligase protein_coding | 36264597  | 36274679    | 1  |
| Rps15      | ribosomal protein_coding                      | 80292453  | 80294114    | 10 |
| S100a9     | S100 calcium binding protein_coding           | 90692632  | 90695721    | 3  |
| Tap2       | transporter 2 protein_coding                  | 34203527  | 34216321    | 17 |
| Angptl4    | angiopoietin-like protein_coding              | 33773750  | 33781575    | 17 |
| Sptbn1     | spectrin beta protein_coding                  | 30099395  | 30268175    | 11 |
| Tmf1       | TATA element protein_coding                   | 97152997  | 97179122    | 6  |
| Atp5j2     | ATP synthase protein_coding                   | 145183698 | 145192062   | 5  |
| Lrrc47     | leucine rich repeat protein_coding            | 154011731 | 154021513   | 4  |
| Hdac5      | histone deacetylase protein_coding            | 102194432 | 102230166   | 11 |
| Ddx5       | DEAD (Asp-Glu) box protein_coding             | 106780355 | 106789185   | 11 |
| Morc2a     | microRNA cluster protein_coding               | 3649494   | 3690477     | 11 |
| Cdc42ep4   | CDC42 effector protein_coding                 | 113726850 | 113751881   | 11 |
| Nrip1      | nuclear receptor corepressor protein_coding   | 76287400  | 76373827    | 16 |
| Rpl23a     | ribosomal protein_coding                      | 78180932  | 78183584    | 11 |
| Ccdc117    | coiled-coil domain protein_coding             | 5528887   | 5542187     | 11 |



|           |                 |                |           |           |           |    |
|-----------|-----------------|----------------|-----------|-----------|-----------|----|
| Eif5b     | eukaryotic tra  | protein_coding | coding    | 37998010  | 38055579  | 1  |
| Atox1     | antioxidant 1   | protein_coding | coding    | 55446641  | 55461239  | 11 |
| Bag3      | BCL2-associated | protein_coding | coding    | 128523616 | 128546981 | 7  |
| Hkdc1     | hexokinase d    | protein_coding | coding    | 62383137  | 62422491  | 10 |
| Zyx       | zyxin [Source   | protein_coding | coding    | 42349630  | 42360213  | 6  |
| Pitpna    | phosphatidyli   | protein_coding | coding    | 75588097  | 75628804  | 11 |
| Nus1      | NUS1 dehydr     | protein_coding | coding    | 52417547  | 52440183  | 10 |
| Hps1      | HPS1, biogen    | protein_coding | coding    | 42755105  | 42779978  | 19 |
| Bspry     | B-box and SP    | protein_coding | coding    | 62480053  | 62497298  | 4  |
| Ran       | RAN, membe      | protein_coding | coding    | 129020069 | 129024323 | 5  |
| Kctd15    | potassium ch    | protein_coding | coding    | 34639014  | 34656732  | 7  |
| Tmem33    | transmembræ     | protein_coding | coding    | 67260565  | 67291461  | 5  |
| Arhgef10l | Rho guanine     | protein_coding | coding    | 140514485 | 140666012 | 4  |
| Rps8      | ribosomal pr    | protein_coding | coding    | 117153827 | 117156243 | 4  |
| Dnah9     | dynein, axon    | protein_coding | coding    | 65831282  | 66168551  | 11 |
| Rps26     | ribosomal pr    | protein_coding | coding    | 128624534 | 128626747 | 10 |
| Ifitm2    | interferon inc  | protein_coding | coding    | 140954837 | 140955987 | 7  |
| Setd6     | SET domain c    | protein_coding | coding    | 95715881  | 95719010  | 8  |
| Rnase4    | ribonuclease,   | protein_coding | coding    | 51091077  | 51106151  | 14 |
| Rpl19     | ribosomal pr    | protein_coding | coding    | 98026710  | 98030492  | 11 |
| Llg12     | lethal giant la | protein_coding | coding    | 115824049 | 115855780 | 11 |
| Cflar     | CASP8 and F/    | protein_coding | coding    | 58711508  | 58758884  | 1  |
| Rbm33     | RNA binding     | protein_coding | coding    | 28317121  | 28419239  | 5  |
| Mbd2      | methyl-CpG t    | protein_coding | coding    | 70568189  | 70626131  | 18 |
| Mcf2l     | mcf.2 transfo   | protein_coding | coding    | 12873806  | 13020905  | 8  |
| Cirbp     | cold inducibl   | protein_coding | coding    | 80165985  | 80172786  | 10 |
| Trim65    | tripartite mol  | protein_coding | coding    | 116121846 | 116131128 | 11 |
| Serf2     | small EDRK-ri   | protein_coding | coding    | 121449195 | 121458313 | 2  |
| Myl12a    | myosin, light   | protein_coding | coding    | 70993656  | 71002878  | 17 |
| Pde4b     | phosphodiest    | protein_coding | coding    | 102087543 | 102607259 | 4  |
| Spcs2     | signal peptid   | protein_coding | coding    | 99837569  | 99863462  | 7  |
| Kdm5b     | lysine (K)-spe  | protein_coding | coding    | 134560171 | 134635285 | 1  |
| Cd300lf   | CD300 molec     | protein_coding | coding    | 115116214 | 115133992 | 11 |
| Pla2g7    | phospholipas    | protein_coding | coding    | 43568098  | 43612201  | 17 |
| Fgfr2     | fibroblast gro  | protein_coding | coding    | 130162451 | 133123350 | 7  |
| Rpl32     | ribosomal pr    | protein_coding | coding    | 115805505 | 115808747 | 6  |
| Gm12480   | predicted ger   | lincRNA        | noncoding | 54651903  | 54656077  | 4  |
| Banp      | BTG3 associa    | protein_coding | coding    | 121949750 | 122029258 | 8  |
| Rps6ka1   | ribosomal pr    | protein_coding | coding    | 133847290 | 133887797 | 4  |
| Rp1       | retinitis pigm  | protein_coding | coding    | 3999557   | 4409241   | 1  |
| Dtx3      | deltex 3, E3 u  | protein_coding | coding    | 127190378 | 127195728 | 10 |

|            |                                                                                    |           |             |    |
|------------|------------------------------------------------------------------------------------|-----------|-------------|----|
| Coro2b     | coronin, actin protein_coding                                                      | 62419492  | 62537044    | 9  |
| Rnf7       | ring finger protein_coding                                                         | 96470937  | 96478675    | 9  |
| Kcne2      | potassium voltage protein_coding                                                   | 92292389  | 92298129    | 16 |
| Rpl36al    | ribosomal protein_coding                                                           | 69182731  | 69184083    | 12 |
| N4bp3      | NEDD4 binding protein_coding                                                       | 51643063  | 51650842    | 11 |
| Rps6       | ribosomal protein_coding                                                           | 86854660  | 86857412    | 4  |
| U2af1      | U2 small nuclear protein_coding                                                    | 31647082  | 31658754    | 17 |
| Hps3       | HPS3, biogenesis protein_coding                                                    | 19995945  | 20035315    | 3  |
| Gm8797     | predicted protein_coding                                                           | 5750806   | 5751295     | 3  |
| Dock2      | dedicator of cytokinesis protein_coding                                            | 34226815  | 34783892    | 11 |
| Trpm2      | transient receptor potential cation channel protein_coding                         | 77907722  | 77970563    | 10 |
| Slf2       | SMC5-SMC6 complex protein_coding                                                   | 44931119  | 44983787    | 19 |
| Ptpn11     | protein tyrosine phosphatase protein_coding                                        | 121130533 | 121191397   | 5  |
| Kcnc3      | potassium voltage-gated channel class C subfamily 3 member 3 protein_coding        | 44590664  | 44604754    | 7  |
| Myl9       | myosin, light chain 9 protein_coding                                               | 156775420 | 156781658   | 2  |
| Dennd1c    | DENN/MADD domain containing 1c protein_coding                                      | 57066056  | 57078510    | 17 |
| Slirp      | SRA stem-loop binding protein_coding                                               | 87443896  | 87452206    | 12 |
| Plpp6      | phospholipid phosphatase 6 protein_coding                                          | 28963953  | 28966811    | 19 |
| Edem1      | ER degradation factor 1 protein_coding                                             | 108828641 | 108859356   | 6  |
| Slc39a10   | solute carrier family 39 member 10 protein_coding                                  | 46807544  | 46892852    | 1  |
| Ndufa10    | NADH dehydrogenase subunit A10 protein_coding                                      | 92439010  | 92473860    | 1  |
| Herpud1    | homocysteine-inducible ubiquitin-protein ligase domain containing 1 protein_coding | 94386438  | 94395377    | 8  |
| Rplp1      | ribosomal protein L1 protein_coding                                                | 61913284  | 61914542    | 9  |
| Ptpn12     | protein tyrosine phosphatase 12 protein_coding                                     | 20986645  | 21055911    | 5  |
| Armcx4     | armadillo repeat domain containing 4 protein_coding                                | 134686519 | 134696757 X |    |
| Gspt1      | G1 to S phase transition protein 1 protein_coding                                  | 11219292  | 11254270    | 16 |
| Zbtb22     | zinc finger and BTB domain containing 22 protein_coding                            | 33915904  | 33919324    | 17 |
| Sorbs1     | sorbin and SH3 domain containing 1 protein_coding                                  | 40294753  | 40513779    | 19 |
| 2410015M20 | RIKEN cDNA 2410015M20 protein_coding                                               | 56607452  | 56609771    | 17 |
| Btf3       | basic transcription factor 3 protein_coding                                        | 98309896  | 98317006    | 13 |
| Mgp        | matrix Gla protein protein_coding                                                  | 136872435 | 136875823   | 6  |
| Hipk2      | homeodomain protein 2 protein_coding                                               | 38694390  | 38876165    | 6  |
| Relt       | RELT tumor necrosis factor receptor protein_coding                                 | 100845847 | 100863446   | 7  |
| Rack1      | receptor for activated C kinase 1 protein_coding                                   | 48800332  | 48806434    | 11 |
| Acss1      | acyl-CoA synthetase long chain family 1 member 1 protein_coding                    | 150618105 | 150668500   | 2  |
| Gfpt1      | glutamine fructose-6-phosphate transaminase 1 protein_coding                       | 87042846  | 87092197    | 6  |
| Cd19       | CD19 antigen protein_coding                                                        | 126408450 | 126414889   | 7  |
| Ddx42      | DEAD (Asp-Glu) box protein 42 protein_coding                                       | 106216926 | 106249139   | 11 |
| Zfp949     | zinc finger protein 949 protein_coding                                             | 88548020  | 88571061    | 9  |
| Cdc42ep1   | CDC42 effector 1 protein_coding                                                    | 78842647  | 78850902    | 15 |
| Zbtb46     | zinc finger and BTB domain containing 46 protein_coding                            | 181387762 | 181459426   | 2  |

|             |                                              |           |           |    |
|-------------|----------------------------------------------|-----------|-----------|----|
| Nova2       | neuro-oncologic protein_coding               | 18925888  | 18965319  | 7  |
| Vps36       | vacuolar protein_coding                      | 22192809  | 22220843  | 8  |
| Psmc3       | proteasome (protein_coding                   | 91054009  | 91066369  | 2  |
| Dnajb9      | DnaJ heat shock protein_coding               | 44205559  | 44210326  | 12 |
| Col4a4      | collagen, type protein_coding                | 82448423  | 82586849  | 1  |
| Serpinh1    | serine (or cysteine protein_coding           | 99345376  | 99353239  | 7  |
| Snap23      | synaptosomal protein_coding                  | 120567671 | 120601255 | 2  |
| Gm42715     | predicted gene protein_coding                | 127519584 | 127567054 | 7  |
| Crip2       | cysteine rich protein_coding                 | 113140236 | 113145506 | 12 |
| Chst3       | carbohydrate protein_coding                  | 60181532  | 60219260  | 10 |
| A230050P20f | RIKEN cDNA clone protein_coding              | 20868642  | 20874307  | 9  |
| Hist1h4h    | histone cluster protein_coding               | 23531050  | 23531519  | 13 |
| Lyz2        | lysozyme 2 [S protein_coding                 | 117277331 | 117282321 | 10 |
| Pi4k2b      | phosphatidylinositol protein_coding          | 52741574  | 52769340  | 5  |
| Cox7a2      | cytochrome c protein_coding                  | 79755361  | 79759878  | 9  |
| Rusc2       | RUN and SH3 protein_coding                   | 43381979  | 43427088  | 4  |
| mt-Nd4l     | mitochondrial protein_mito                   | 9877      | 10173 MT  |    |
| Cyfp2       | cytoplasmic F protein_coding                 | 46193850  | 46312859  | 11 |
| Gjc1        | gap junction protein_coding                  | 102799579 | 102819700 | 11 |
| Dnajc25     | DnaJ heat shock protein_coding               | 58995062  | 59025573  | 4  |
| Jak3        | Janus kinase 3 protein_coding                | 71676296  | 71690575  | 8  |
| Spns2       | spinster homolog protein_coding              | 72451638  | 72489904  | 11 |
| Sorbs3      | sorbin and SH3 protein_coding                | 70180468  | 70207637  | 14 |
| Mmp9        | matrix metalloproteinase protein_coding      | 164940780 | 164955850 | 2  |
| C1s1        | complement protein_coding                    | 124530345 | 124542359 | 6  |
| Dna11       | dynein, axonemal protein_coding              | 84114366  | 84147498  | 12 |
| Tnk2        | tyrosine kinase 2 protein_coding             | 32643874  | 32683493  | 16 |
| Cnot2       | CCR4-NOT transcription factor protein_coding | 116485161 | 116581511 | 10 |
| Aff3        | AF4/FMR2 family protein_coding               | 38177326  | 38664955  | 1  |
| Ramp2       | receptor component protein_coding            | 101246028 | 101259546 | 11 |
| Nop10       | NOP10 ribonucleoprotein_coding               | 112261926 | 112263269 | 2  |
| Tbc1d19     | TBC1 domain protein_coding                   | 53809606  | 53903965  | 5  |
| Gm21781     | predicted gene lincRNA noncoding             | 4391587   | 4396424   | 10 |
| Sftpc       | surfactant associated protein_coding         | 70520941  | 70524081  | 14 |
| Dap         | death-associated protein_coding              | 31224314  | 31274341  | 15 |
| Junb        | jun B proto-oncogene protein_coding          | 84974484  | 84978718  | 8  |
| Creld2      | cysteine-rich domain protein_coding          | 88819646  | 88826681  | 15 |
| Gm26547     | predicted gene lincRNA noncoding             | 55557166  | 55563507  | 17 |
| Plk2        | polo-like kinase protein_coding              | 110395046 | 110400844 | 13 |
| Pla2g1b     | phospholipase protein_coding                 | 115466262 | 115474722 | 5  |
| Aip         | aryl-hydrocarbon receptor protein_coding     | 4114446   | 4125858   | 19 |

|          |                                                               |           |           |    |
|----------|---------------------------------------------------------------|-----------|-----------|----|
| Rab6a    | RAB6A, mem protein_coding                                     | 100607410 | 100641268 | 7  |
| Gnai2    | guanine nucleotide-binding protein G(i) class alpha-2 subunit | 107614125 | 107635367 | 9  |
| Phf14    | PHD finger protein 14                                         | 11907809  | 12081205  | 6  |
| Cul4a    | cullin 4A [Source:HGSC Symbol] protein_coding                 | 13105621  | 13147940  | 8  |
| Rpl29    | ribosomal protein L29                                         | 106429454 | 106431568 | 9  |
| Retnlg   | resistin like gene 1                                          | 48872608  | 48874498  | 16 |
| Slc26a9  | solute carrier family 26 member 9                             | 131744022 | 131771504 | 1  |
| Rps19    | ribosomal protein S19                                         | 24884371  | 24889806  | 7  |
| Grk6     | G protein-coupled receptor kinase-6                           | 55445072  | 55460927  | 13 |
| Helq     | helicase, POL32-like                                          | 100762145 | 100798598 | 5  |
| Dgcr8    | DGCR8, microRNA processing                                    | 18253948  | 18289249  | 16 |
| Sod1     | superoxide dismutase 1                                        | 90220742  | 90226322  | 16 |
| Ppa1     | pyrophosphatase 1                                             | 61648552  | 61674168  | 10 |
| Mark2    | MAP/microtubule-associated protein 2                          | 7275396   | 7341860   | 19 |
| Stk11ip  | serine/threonine kinase 11 interacting protein                | 75521529  | 75537335  | 1  |
| Klf15    | Kruppel-like factor 15                                        | 90462576  | 90475238  | 6  |
| Fkbp4    | FK506 binding protein 4                                       | 128429735 | 128438677 | 6  |
| Fxyd1    | FXD domain protein 1                                          | 31051678  | 31057199  | 7  |
| Kctd11   | potassium channel tetramerization domain containing 11        | 69878261  | 69881406  | 11 |
| Lamb2    | laminin, beta 2                                               | 108479736 | 108490530 | 9  |
| Slc38a10 | solute carrier family 38 member 10                            | 120103960 | 120151346 | 11 |
| Rpl24    | ribosomal protein L24                                         | 55966275  | 55971435  | 16 |
| Cd209a   | CD209a antigen                                                | 3743397   | 3748984   | 8  |
| Rpl28    | ribosomal protein L28                                         | 4792874   | 4795066   | 7  |
| mt-Cytb  | mitochondrial cytochrome b                                    | 14145     | 15288 MT  |    |
| Nckap5l  | NCK-associated protein 5                                      | 99422035  | 99457748  | 15 |
| Cdan1    | congenital deafness associated protein 1                      | 120716154 | 120850128 | 2  |
| Clic4    | chloride intracellular channel 4                              | 135213969 | 135272814 | 4  |
| Hc       | hemolytic complement protein                                  | 34983331  | 35061438  | 2  |
| Ttc39a   | tetratricopeptide repeat domain containing 39A                | 109406623 | 109444745 | 4  |
| Plcg1    | phospholipase C gamma 1                                       | 160731300 | 160775760 | 2  |
| Mrm1     | mitochondrial ribosomal protein m1                            | 84813061  | 84819515  | 11 |
| Nectin4  | nectin cell adhesion molecule 4                               | 171370099 | 171388598 | 1  |
| Pak4     | p21 protein kinase 4                                          | 28558819  | 28598185  | 7  |
| Snhg11   | small nucleolar H-glycoprotein 11                             | 158375638 | 158386145 | 2  |
| Calr     | calreticulin [Source:HGSC Symbol]                             | 84841850  | 84846934  | 8  |
| Hdgf     | hepatoma-derived growth factor                                | 87906321  | 87916132  | 3  |
| Cbx5     | chromobox 5                                                   | 103191544 | 103239816 | 15 |
| Rps27a   | ribosomal protein S27A                                        | 29545846  | 29548109  | 11 |
| Paps2    | 3'-phosphoadenylyl transferase 2                              | 32620005  | 32667187  | 19 |
| Foxf1    | forkhead box protein F1                                       | 121084386 | 121088144 | 8  |

|             |                                          |                   |           |           |    |
|-------------|------------------------------------------|-------------------|-----------|-----------|----|
| Bak1        | BCL2-antagonist protein                  | coding            | 27019810  | 27029009  | 17 |
| Gm14403     | predicted germ protein                   | coding            | 177498215 | 177509763 | 2  |
| Gmip        | Gem-interacting protein                  | coding            | 69808679  | 69821870  | 8  |
| Tsc22d1     | TSC22 domain protein                     | coding            | 76414961  | 76507765  | 14 |
| Hipk3       | homeodomain protein                      | coding            | 104426481 | 104494446 | 2  |
| Tmem252     | transmembrane protein                    | coding            | 24674008  | 24679661  | 19 |
| C77080      | expressed sequence                       | coding            | 129219578 | 129261404 | 4  |
| Msl1        | male-specific protein                    | coding            | 98795516  | 98807859  | 11 |
| Zfyve27     | zinc finger, FY protein                  | coding            | 42163951  | 42194590  | 19 |
| Tab2        | TGF-beta activating protein              | coding            | 7905653   | 7956230   | 10 |
| Rps11       | ribosomal protein                        | coding            | 45122379  | 45124439  | 7  |
| Mical1      | microtubule associated protein           | coding            | 41476314  | 41487032  | 10 |
| Maz         | MYC-associated protein                   | coding            | 127022130 | 127027037 | 7  |
| Pcdh17      | protocadherin protein                    | coding            | 84443563  | 84537060  | 14 |
| Mettl27     | methyltransferase protein                | coding            | 134932368 | 134942637 | 5  |
| Fth1        | ferritin heavy chain protein             | coding            | 9982703   | 9985092   | 19 |
| Dpt         | dermatopontin protein                    | coding            | 164796644 | 164824266 | 1  |
| Dusp12      | dual specificity phosphatase             | coding            | 170873498 | 170885540 | 1  |
| Selplg      | selectin, platelet protein               | coding            | 113818536 | 113832644 | 5  |
| Chia1       | chitinase, acidic protein                | coding            | 106113229 | 106132120 | 3  |
| Uqcrl1      | ubiquinol-cytochrome b5 reductase        | coding            | 80402997  | 80406830  | 10 |
| Taf3        | TATA-box binding protein                 | coding            | 9914552   | 10048596  | 2  |
| Tmem2       | transmembrane protein                    | coding            | 124540695 | 124550506 | 5  |
| Chst15      | carbohydrate sulfotransferase            | coding            | 132235780 | 132317228 | 7  |
| Hikeshi     | heat shock protein                       | coding            | 89917529  | 89941204  | 7  |
| Trappc11    | trafficking protein                      | coding            | 47490115  | 47533470  | 8  |
| Pde8a       | phosphodiesterase                        | coding            | 81213596  | 81334533  | 7  |
| Rpp40       | ribonuclease P protein                   | coding            | 35893472  | 35906359  | 13 |
| Cwc15       | CWC15 splice factor                      | coding            | 14500617  | 14510577  | 9  |
| Slamf6      | SLAM family member                       | coding            | 171917515 | 171953170 | 1  |
| Cfap46      | cilia and flagellum associated protein   | coding            | 139600951 | 139683817 | 7  |
| Srebf2      | sterol regulatory element binding factor | coding            | 82147266  | 82205376  | 15 |
| Ybx1        | Y box protein                            | coding            | 119277981 | 119294604 | 4  |
| Emsy        | EMSY, BRCA2 associated protein           | coding            | 98587137  | 98656783  | 7  |
| Slc37a3     | solute carrier                           | coding            | 39334773  | 39377675  | 6  |
| Neat1       | nuclear paraspeckle lincRNA              | noncoding         | 5824708   | 5845478   | 19 |
| Pea15a      | phosphoprotein                           | coding            | 172196728 | 172206804 | 1  |
| Sec14l1     | SEC14-like lipid binding protein         | coding            | 117115168 | 117159268 | 11 |
| Kdsr        | 3-ketodihydroxyacyl-CoA synthase         | coding            | 106720459 | 106759727 | 1  |
| Snrpg       | small nuclear ribonucleoprotein          | coding            | 86371304  | 86379328  | 6  |
| 2900097C17f | RIKEN cDNA                               | lincRNA noncoding | 156388065 | 156392979 | 2  |

|           |                                                             |           |             |    |
|-----------|-------------------------------------------------------------|-----------|-------------|----|
| Ccl9      | chemokine (C protein_coding                                 | 83572919  | 83578636    | 11 |
| Nkd1      | naked cuticle protein_coding                                | 88521354  | 88594884    | 8  |
| Lin54     | lin-54 homolog protein_coding                               | 100441918 | 100500639   | 5  |
| Phb       | prohibitin [Sc protein_coding                               | 95666957  | 95680773    | 11 |
| Fmo2      | flavin containing protein_coding                            | 162874317 | 162898726   | 1  |
| Abi2      | abl-interactor protein_coding                               | 60409619  | 60481158    | 1  |
| Sox5      | SRY (sex determining protein_coding                         | 143828425 | 144781977   | 6  |
| Eda       | ectodysplasin protein_coding                                | 99975606  | 100400762 X |    |
| Gm5113    | predicted germline protein_coding                           | 30169875  | 30182324    | 7  |
| Naa60     | N(alpha)-acetylglucosaminase protein_coding                 | 3872375   | 3904780     | 16 |
| Krt80     | keratin 80 [Sc protein_coding                               | 101349571 | 101370125   | 15 |
| Rpl10-ps3 | ribosomal protein L10-ps3 protein_coding                    | 50344201  | 50344968    | 9  |
| Prex1     | phosphatidylinositol 3-kinase protein_coding                | 166566342 | 166713832   | 2  |
| Iffo1     | intermediate filament protein_coding                        | 125145241 | 125161782   | 6  |
| Dzank1    | double zinc finger protein_coding                           | 144470557 | 144527414   | 2  |
| Rpl34     | ribosomal protein L34 protein_coding                        | 130726831 | 130730398   | 3  |
| Rps29     | ribosomal protein S29 protein_coding                        | 69157722  | 69159186    | 12 |
| Wasf2     | WAS protein protein_coding                                  | 133130505 | 133199756   | 4  |
| Ndufa11   | NADH dehydrogenase subunit 11 protein_coding                | 56717762  | 56724248    | 17 |
| Arpc5l    | actin related protein 5-like protein_coding                 | 39005348  | 39015877    | 2  |
| Pkia      | protein kinase A catalytic subunit protein_coding           | 7366669   | 7445366     | 3  |
| Thbs1     | thrombospondin 1 protein_coding                             | 118111876 | 118127133   | 2  |
| Phldb1    | pleckstrin homology domain 1 protein_coding                 | 44686304  | 44735198    | 9  |
| Elob      | elongin B [So protein_coding                                | 23824740  | 23829109    | 17 |
| Trabd2b   | TraB domain protein_coding                                  | 114406724 | 114615098   | 4  |
| Gatad1    | GATA zinc finger protein_coding                             | 3632932   | 3657185     | 5  |
| Tbc1d17   | TBC1 domain protein_coding                                  | 44834623  | 44849079    | 7  |
| Phactr2   | phosphatase protein_coding                                  | 13207717  | 13474412    | 10 |
| Txndc9    | thioredoxin domain containing protein_coding                | 37985189  | 37997893    | 1  |
| Ubb       | ubiquitin B [S protein_coding                               | 62551171  | 62553213    | 11 |
| Numb      | numb homolog protein_coding                                 | 83794034  | 83921934    | 12 |
| Reg2      | regenerating protein_coding                                 | 78395623  | 78408106    | 6  |
| Ptprc     | protein tyrosine phosphatase receptor type C protein_coding | 138062861 | 138175708   | 1  |
| Mlxip     | MLX interacting protein protein_coding                      | 123394798 | 123457932   | 5  |

**seqStrand**    **seqCoordSystem**

1 chromosome  
1 chromosome  
1 chromosome  
1 chromosome  
-1 chromosome  
-1 chromosome  
-1 chromosome  
1 chromosome  
1 chromosome  
1 chromosome  
1 chromosome  
-1 chromosome  
1 chromosome  
-1 chromosome  
1 chromosome  
-1 chromosome  
-1 chromosome  
-1 chromosome  
-1 chromosome  
-1 chromosome  
1 chromosome  
-1 chromosome  
-1 chromosome  
-1 chromosome  
1 chromosome  
-1 chromosome  
1 chromosome  
-1 chromosome  
-1 chromosome  
-1 chromosome  
1 chromosome  
1 chromosome  
-1 chromosome  
1 chromosome  
-1 chromosome  
-1 chromosome  
-1 chromosome  
1 chromosome  
1 chromosome  
-1 chromosome  
1 chromosome  
-1 chromosome  
-1 chromosome

-1 chromosome  
-1 chromosome  
-1 chromosome  
1 chromosome  
1 chromosome  
1 chromosome  
1 chromosome  
1 chromosome  
-1 chromosome  
-1 chromosome  
1 chromosome  
-1 chromosome  
1 chromosome  
1 chromosome  
1 chromosome  
1 chromosome  
-1 chromosome  
-1 chromosome  
1 chromosome  
1 chromosome  
1 chromosome  
-1 chromosome  
1 chromosome  
1 chromosome  
1 chromosome  
-1 chromosome  
1 chromosome  
-1 chromosome  
-1 chromosome  
-1 chromosome  
-1 chromosome  
1 chromosome  
-1 chromosome  
1 chromosome  
1 chromosome  
1 chromosome  
1 chromosome  
-1 chromosome  
1 chromosome  
-1 chromosome  
1 chromosome



-1 chromosome  
-1 chromosome  
1 chromosome  
-1 chromosome  
1 chromosome  
1 chromosome  
-1 chromosome  
-1 chromosome  
1 chromosome  
1 chromosome  
1 chromosome  
1 chromosome  
-1 chromosome  
1 chromosome  
1 chromosome  
-1 chromosome  
1 chromosome  
1 chromosome  
1 chromosome  
-1 chromosome  
-1 chromosome  
1 chromosome  
-1 chromosome  
-1 chromosome  
-1 chromosome  
-1 chromosome  
1 chromosome  
-1 chromosome  
1 chromosome  
1 chromosome  
-1 chromosome  
1 chromosome

1 chromosome  
-1 chromosome  
-1 chromosome  
-1 chromosome  
1 chromosome  
1 chromosome  
1 chromosome  
-1 chromosome  
1 chromosome  
-1 chromosome  
-1 chromosome  
-1 chromosome  
1 chromosome  
1 chromosome  
1 chromosome  
-1 chromosome  
-1 chromosome  
-1 chromosome  
1 chromosome  
1 chromosome  
1 chromosome  
-1 chromosome  
1 chromosome  
-1 chromosome  
-1 chromosome  
-1 chromosome  
-1 chromosome  
1 chromosome  
1 chromosome  
1 chromosome  
-1 chromosome  
1 chromosome  
1 chromosome  
1 chromosome

1 chromosome  
1 chromosome  
-1 chromosome  
-1 chromosome  
1 chromosome  
1 chromosome  
1 chromosome  
-1 chromosome  
1 chromosome  
-1 chromosome  
1 chromosome  
-1 chromosome  
1 chromosome  
-1 chromosome  
1 chromosome  
1 chromosome  
-1 chromosome  
1 chromosome  
-1 chromosome  
1 chromosome  
-1 chromosome  
-1 chromosome  
-1 chromosome  
1 chromosome  
-1 chromosome  
-1 chromosome  
1 chromosome  
-1 chromosome  
-1 chromosome  
-1 chromosome

1 chromosome  
-1 chromosome  
1 chromosome  
-1 chromosome  
1 chromosome  
1 chromosome  
1 chromosome  
-1 chromosome  
1 chromosome  
1 chromosome  
-1 chromosome  
1 chromosome  
-1 chromosome  
-1 chromosome  
-1 chromosome  
-1 chromosome  
1 chromosome  
-1 chromosome  
1 chromosome  
-1 chromosome  
1 chromosome  
-1 chromosome  
1 chromosome  
-1 chromosome  
-1 chromosome  
1 chromosome  
1 chromosome  
-1 chromosome  
-1 chromosome  
-1 chromosome

-1 chromosome  
-1 chromosome  
1 chromosome  
-1 chromosome  
-1 chromosome  
-1 chromosome  
-1 chromosome  
-1 chromosome  
1 chromosome  
-1 chromosome  
-1 chromosome  
1 chromosome  
-1 chromosome  
1 chromosome  
1 chromosome  
-1 chromosome  
1 chromosome  
1 chromosome  
1 chromosome  
-1 chromosome  
-1 chromosome  
1 chromosome  
-1 chromosome  
-1 chromosome  
1 chromosome  
-1 chromosome  
-1 chromosome  
-1 chromosome  
-1 chromosome  
-1 chromosome  
-1 chromosome  
1 chromosome  
-1 chromosome  
1 chromosome  
-1 chromosome  
1 chromosome  
1 chromosome  
1 chromosome  
-1 chromosome

1 chromosome  
1 chromosome  
1 chromosome  
-1 chromosome  
-1 chromosome  
-1 chromosome  
1 chromosome  
1 chromosome  
1 chromosome  
-1 chromosome  
1 chromosome  
1 chromosome  
-1 chromosome  
1 chromosome  
-1 chromosome  
1 chromosome  
1 chromosome  
-1 chromosome  
-1 chromosome  
1 chromosome  
1 chromosome  
-1 chromosome  
-1 chromosome  
1 chromosome  
1 chromosome  
1 chromosome  
-1 chromosome  
1 chromosome  
-1 chromosome  
1 chromosome  
1 chromosome  
1 chromosome  
1 chromosome  
-1 chromosome

1 chromosome  
-1 chromosome  
1 chromosome  
-1 chromosome  
-1 chromosome  
1 chromosome  
1 chromosome  
-1 chromosome  
1 chromosome  
-1 chromosome  
-1 chromosome  
-1 chromosome  
1 chromosome  
-1 chromosome  
1 chromosome  
-1 chromosome  
1 chromosome  
1 chromosome  
-1 chromosome  
-1 chromosome  
-1 chromosome  
-1 chromosome  
1 chromosome  
1 chromosome  
-1 chromosome  
1 chromosome  
-1 chromosome  
1 chromosome  
-1 chromosome  
1 chromosome  
1 chromosome

-1 chromosome  
1 chromosome  
1 chromosome  
1 chromosome  
-1 chromosome  
1 chromosome  
-1 chromosome  
1 chromosome  
1 chromosome  
-1 chromosome  
-1 chromosome  
1 chromosome  
-1 chromosome  
1 chromosome  
1 chromosome  
1 chromosome  
1 chromosome  
1 chromosome  
-1 chromosome  
-1 chromosome  
1 chromosome  
-1 chromosome  
-1 chromosome  
1 chromosome  
-1 chromosome  
-1 chromosome  
1 chromosome  
-1 chromosome  
1 chromosome  
1 chromosome  
-1 chromosome  
1 chromosome  
-1 chromosome  
-1 chromosome  
-1 chromosome  
-1 chromosome  
-1 chromosome  
1 chromosome  
-1 chromosome  
1 chromosome  
-1 chromosome



-1 chromosome  
1 chromosome  
-1 chromosome  
1 chromosome  
-1 chromosome  
1 chromosome  
-1 chromosome  
1 chromosome  
1 chromosome  
1 chromosome  
-1 chromosome  
-1 chromosome  
-1 chromosome  
1 chromosome  
-1 chromosome  
-1 chromosome  
-1 chromosome  
1 chromosome  
1 chromosome  
1 chromosome  
1 chromosome  
1 chromosome  
-1 chromosome  
-1 chromosome  
1 chromosome  
-1 chromosome  
-1 chromosome  
-1 chromosome  
-1 chromosome  
1 chromosome  
1 chromosome  
-1 chromosome  
1 chromosome  
-1 chromosome  
1 chromosome
