# Supplementary material
Source: PubMed Central journal article supplement (PMC6511979)
Supplement: NIHMS1021778-supplement-Suppl_Tables.pdf [file NIHMS1021778-supplement-Suppl_Tables.pdf]

## SUPPLEMENTARY TABLES

**Table S1. List of Antibodies**

| <b>Immunohistochemistry</b>      |                     |                                            |
|----------------------------------|---------------------|--------------------------------------------|
| Meca32                           | 129501              | BioLegend                                  |
| Myeloperoxidase                  | A0398               | Dako (Dilution 1: 3500)                    |
| MAC-2                            | CL8942AP            | Cedarlane (Dilution 1: 8000)               |
| <b>Immunofluorescence</b>        |                     |                                            |
| ECAD                             | clone 24E10         | Cell signaling (Dilution 1: 50)            |
| ZEB1                             | sc-25388            | Santa Cruz Biotechnology (Dilution 1: 150) |
| SV40 T Ag                        | Pab101              | Santa Cruz Biotechnology (Dilution 1: 75)  |
| Cleaved Caspase3                 | Cell Signaling 9664 | Cell Signaling (Dilution 1: 50)            |
| KI67                             | SP6                 | ThermoFisher Scientific (Dilution 1: 200)  |
| CK14                             | PRP-155P            | Biolegend (Dilution 1:50)                  |
| CK8                              | TROMA-I             | DSHB (Dilution 1:50)                       |
| hMIT                             | MAB1273             | Millipore (Dilution 1: 50)                 |
| Alexa Fluor 488 goat anti-mouse  | A11001              | Invitrogen (Dilution 1: 200)               |
| Alexa Fluor 594 goat anti-rabbit | A11012              | Invitrogen (Dilution 1: 200)               |
| Alexa Fluor 647 goat anti-rat    | A21247              | Invitrogen (Dilution 1: 200)               |

**Table S2. Flow cytometric markers for hematopoietic stem and progenitor cell population characterization.**

| <b>Cell population markers parental population</b> |                                           |
|----------------------------------------------------|-------------------------------------------|
| Hematopoietic Stem Cell (HSC)                      | Lin- Sca1+ cKit+ CD150+ CD48+ CD45- Flt3- |
| Long-term HSC (LT-HSC)                             | Lin- Sca1+ cKit+ CD34- Flt3-              |
| Short-term HSC (ST-HSC)                            | Lin- Sca1+ cKit+ CD34- Flt3+              |
| Multipotent progenitor (MPP)                       | Lin- Sca1+ cKit+ CD150- CD48+             |
| Common lymphoid progenitor (CLP)                   | Lin- Sca1+ cKit+ IL7Ra+                   |
| Myeloid progenitor (MP)                            | Lin- Sca1- cKit+ IL7Ra-                   |
| Common myeloid progenitor (CMP)                    | Lin- Sca1- cKit+ IL7Ra- CD34+ FCgRII/III- |
| Granulocyte-monocyte progenitor (GMP)              | Lin- Sca1- cKit+ IL7Ra- CD34+ FCgRII/III+ |
| Megakaryocyte/erythroid progenitor (MEP)           | Lin- Sca1- cKit+ IL7Ra- CD34- FCgRII/III- |
